# Supplementary material
Source: MDPI journal article supplement (https://www.mdpi.com/2304-6732/8/2/36)
Supplement: s1 [file s1]

Archive with 123 entries (123 files):
- Supplementary_MG_et_al_revised_2.tex
- Supplementary_MG_et_al_revised_2.pdf
- FIGURES/Fig10_A_ANN.eps
- FIGURES/Fig10_A_ANN-eps-converted-to.pdf
- FIGURES/Fig10_A_ANN.pdf
- FIGURES/Fig10_A_ANN.svg
- FIGURES/Fig10_A.eps
- FIGURES/Fig10_A-eps-converted-to.pdf
- FIGURES/Fig10_B_ANN.eps
- FIGURES/Fig10_B_ANN-eps-converted-to.pdf
- FIGURES/Fig10_B_ANN.pdf
- FIGURES/Fig10_B_ANN.svg
- FIGURES/Fig10_B.eps
- FIGURES/Fig10_B-eps-converted-to.pdf
- FIGURES/Fig11_A_ANN.eps
- FIGURES/Fig11_A_ANN-eps-converted-to.pdf
- FIGURES/Fig11_A_ANN.pdf
- FIGURES/Fig11_A_ANN.svg
- FIGURES/Fig11_A.eps
- FIGURES/Fig11_A-eps-converted-to.pdf
- FIGURES/Fig11_B_ANN.eps
- FIGURES/Fig11_B_ANN-eps-converted-to.pdf
- FIGURES/Fig11_B_ANN.pdf
- FIGURES/Fig11_B_ANN.svg
- FIGURES/Fig11_B.eps
- FIGURES/Fig11_B-eps-converted-to.pdf
- FIGURES/Fig1_ANN.eps
- FIGURES/Fig1_ANN-eps-converted-to.pdf
- FIGURES/Fig1_ANN.pdf
- FIGURES/Fig1_ANN.svg
- FIGURES/Fig1.pdf
- FIGURES/Fig2_ANN.eps
- FIGURES/Fig2_ANN-eps-converted-to.pdf
- FIGURES/Fig2_ANN.pdf
- FIGURES/Fig2_ANN.svg
- FIGURES/Fig2.eps
- FIGURES/Fig2-eps-converted-to.pdf
- FIGURES/Fig3_ANN.eps
- FIGURES/Fig3_ANN-eps-converted-to.pdf
- FIGURES/Fig3_ANN.pdf
- FIGURES/Fig3_ANN.svg
- FIGURES/Fig3.pdf
- FIGURES/Fig4_ANN.eps
- FIGURES/Fig4_ANN-eps-converted-to.pdf
- FIGURES/Fig4_ANN.pdf
- FIGURES/Fig4_ANN.svg
- FIGURES/Fig4.eps
- FIGURES/Fig4-eps-converted-to.pdf
- FIGURES/Fig5_ANN.eps
- FIGURES/Fig5_ANN-eps-converted-to.pdf
- FIGURES/Fig5_ANN.pdf
- FIGURES/Fig5_ANN.svg
- FIGURES/Fig5.eps
- FIGURES/Fig5-eps-converted-to.pdf
- FIGURES/Fig6.eps
- FIGURES/Fig6-eps-converted-to.pdf
- FIGURES/Fig7_ANN.eps
- FIGURES/Fig7_ANN-eps-converted-to.pdf
- FIGURES/Fig7_ANN.pdf
- FIGURES/Fig7_ANN.svg
- FIGURES/Fig7.pdf
- FIGURES/Fig8_ANN.eps
- FIGURES/Fig8_ANN-eps-converted-to.pdf
- FIGURES/Fig8_ANN.pdf
- FIGURES/Fig8_ANN.svg
- FIGURES/Fig8.pdf
- FIGURES/Fig9_ANN.eps
- FIGURES/Fig9_ANN-eps-converted-to.pdf
- FIGURES/Fig9_ANN.pdf
- FIGURES/Fig9_ANN.svg
- FIGURES/Fig9.eps
- FIGURES/Fig9-eps-converted-to.pdf
- FIGURES/FigS1.eps
- FIGURES/FigS1-eps-converted-to.pdf
- FIGURES/FigS1.pdf
- FIGURES/FigS1.png
- FIGURES/FigS2_1.eps
- FIGURES/FigS2_1-eps-converted-to.pdf
- FIGURES/FigS2_1.png
- FIGURES/FigS2_2.eps
- FIGURES/FigS2_2-eps-converted-to.pdf
- FIGURES/FigS2_2.png
- FIGURES/FigS2_ANN.eps
- FIGURES/FigS2_ANN-eps-converted-to.pdf
- FIGURES/FigS2_ANN.pdf
- FIGURES/FigS2_ANN.svg
- FIGURES/FigS3.eps
- FIGURES/FigS3-eps-converted-to.pdf
- FIGURES/FigS3.png
- FIGURES/FigS4_1.eps
- FIGURES/FigS4_1-eps-converted-to.pdf
- FIGURES/FigS4_1.png
- FIGURES/FigS4_2.eps
- FIGURES/FigS4_2-eps-converted-to.pdf
- FIGURES/FigS4_2.png
- FIGURES/FigS4_ANN.eps
- FIGURES/FigS4_ANN-eps-converted-to.pdf
- FIGURES/FigS4_ANN.pdf
- FIGURES/FigS4_ANN.svg
- FIGURES/Fig_S4.JPG
- FIGURES/FigS5_ANN.eps
- FIGURES/FigS5_ANN-eps-converted-to.pdf
- FIGURES/FigS5_ANN.pdf
- FIGURES/FigS5_ANN.svg
- FIGURES/FigS5.eps
- FIGURES/FigS5-eps-converted-to.pdf
- FIGURES/FigS5.png
- FIGURES/FigS6_ANN.eps
- FIGURES/FigS6_ANN-eps-converted-to.pdf
- FIGURES/FigS6_ANN.pdf
- FIGURES/FigS6_ANN.svg
- FIGURES/FigS6.eps
- FIGURES/FigS6-eps-converted-to.pdf
- FIGURES/FigS6.png
- FIGURES/FigS7_ANN.eps
- FIGURES/FigS7_ANN-eps-converted-to.pdf
- FIGURES/FigS7_ANN.pdf
- FIGURES/FigS7_ANN.svg
- FIGURES/FigS7.eps
- FIGURES/FigS7-eps-converted-to.pdf
- FIGURES/Fig_S7.JPG
- FIGURES/FigS7.pdf
- BIB/mxenes_bib.bib
