# Supplementary material
Source: MDPI journal article supplement (https://www.mdpi.com/2304-6732/8/2/36)
Supplement: s1 [file s1 › BIB/mxenes_bib.bib]

% Encoding: UTF-8

@Article{Jain_2008,
author = {Jain, Prashant K. and El-Sayed, Mostafa A.},
title = {{Surface Plasmon Coupling and Its Universal Size Scaling in Metal Nanostructures of Complex Geometry: Elongated Particle Pairs and Nanosphere Trimers}},
journal = {The Journal of Physical Chemistry C},
volume = {112},
number = {13},
pages = {4954--4960},
year = {2008},
doi = {10.1021/jp7120356},
URL = {https://doi.org/10.1021/jp7120356},
eprint = {},
}

@Article{Pollutants_2020,
title = {{Large-scale two-dimensional titanium carbide MXene as SERS-active substrate for reliable and sensitive detection of organic pollutants}},
journal = {Spectrochimica Acta Part A: Molecular and Biomolecular Spectroscopy},
volume = {236},
pages = {118336},
year = {2020},
issn = {1386--1425},
doi = {10.1016/j.saa.2020.118336},
url = {http://www.sciencedirect.com/science/article/pii/S1386142520303140},
author = {Rongyang Liu and Li Jiang and Chengxing Lu and Zizhen Yu and Fanghao Li and Xufeng Jing and Rui Xu and Wei Zhou and Shangzhong Jin},
}

@Article{Thickness_2020,
	author = {Limbu, Tej B. and Chitara, Basant and Garcia Cervantes, Martha Y. and Zhou, Yu and Huang, Shengxi and Tang, Yongan and Yan, Fei},
	title = {{Unravelling the Thickness Dependence and Mechanism of Surface-Enhanced Raman Scattering on ${\mathrm{Ti}}_{3}{\mathrm{C}}_{2}{\mathrm{Ti}}_{x}$ MXene Nanosheets}},
	journal = {The Journal of Physical Chemistry C},
	volume = {124},
	number = {32},
	pages = {17772--17782},
	year = {2020},
	doi = {10.1021/acs.jpcc.0c05143},
	URL = {https://doi.org/10.1021/acs.jpcc.0c05143},
	eprint = {},
}

@Article{Naguib_2011,
  author    = {Michael Naguib and Murat Kurtoglu and Volker Presser and Jun Lu and Junjie Niu and Min Heon and Lars Hultman and Yury Gogotsi and Michel W. Barsoum},
  journal   = {Advanced Materials},
  pages     = {4248--4253},
  title     = {{Two-Dimensional Nanocrystals Produced by Exfoliation of ${\mathrm{Ti}}_{3}{\mathrm{Al}}{\mathrm{C}}_{2}$}},
  volume    = {23},
  year      = {2011},
  month     = {Aug},
  number    = {37},
  doi       = {10.1002/adma.201102306},
  publisher = {Wiley},
}

@Article{Xie_2013,
  author    = {Xie, Yu and Kent, P. R. C.},
  journal   = {Physical Review B},
  pages     = {235441},
  title     = {{Hybrid density functional study of structural and electronic properties of functionalized Ti${}_{n+1}{X}_{n}$ ($X=\mathrm{C}$, N) monolayers}},
  volume    = {87},
  year      = {2013},
  month     = {Jun},
  doi       = {10.1103/PhysRevB.87.235441},
  issue     = {23},
  numpages  = {10},
  publisher = {American Physical Society},
  url       = {https://link.aps.org/doi/10.1103/PhysRevB.87.235441},
}

@Article{Hantanasirisakul_2018,
  author    = {Kanit Hantanasirisakul and Yury Gogotsi},
  journal   = {Advanced Materials},
  pages     = {1804779},
  title     = {{Electronic and Optical Properties of 2D Transition Metal Carbides and Nitrides ({MXenes})}},
  volume    = {30},
  year      = {2018},
  month     = {Nov},
  number    = {52},
  doi       = {10.1002/adma.201804779},
  publisher = {Wiley},
}

@Article{Dong_2018,
  author    = {Yongchang Dong and Sergii Chertopalov and Kathleen Maleski and Babak Anasori and Longyu Hu and Sriparna Bhattacharya and Apparao M. Rao and Yury Gogotsi and Vadym N. Mochalin and Ramakrishna Podila},
  journal   = {Advanced Materials},
  pages     = {1705714},
  title     = {{Saturable Absorption in 2D ${\mathrm{Ti}}_{3}{\mathrm{C}}_{2}$ MXene Thin Films for Passive Photonic Diodes}},
  volume    = {30},
  year      = {2018},
  month     = {Jan},
  number    = {10},
  doi       = {10.1002/adma.201705714},
  publisher = {Wiley},
}

@Article{Shahzad_2016,
  author    = {Faisal Shahzad and Mohamed Alhabeb and Christine B. Hatter and Babak Anasori and Soon Man Hong and Chong Min Koo and Yury Gogotsi},
  journal   = {Science},
  pages     = {1137--1140},
  title     = {{Electromagnetic interference shielding with 2D transition metal carbides ({MXenes})}},
  volume    = {353},
  year      = {2016},
  month     = {Sep},
  number    = {6304},
  doi       = {10.1126/science.aag2421},
  publisher = {American Association for the Advancement of Science ({AAAS})},
}

@Article{Zhu_2016,
  author    = {Zhengfeng Zhu and Yousheng Zou and Weida Hu and Yuebin Li and Yu Gu and Bingqiang Cao and Nan Guo and Lin Wang and Jizhong Song and Shengli Zhang and Haoshuang Gu and Haibo Zeng},
  journal   = {Advanced Functional Materials},
  pages     = {1793--1802},
  title     = {{Near-Infrared Plasmonic 2D Semimetals for Applications in Communication and Biology}},
  volume    = {26},
  year      = {2016},
  month     = {Jan},
  number    = {11},
  doi       = {10.1002/adfm.201504884},
  publisher = {Wiley},
}

@Article{Montazeri_2019,
  author    = {Kiana Montazeri and Marc Currie and Louisiane Verger and Pouya Dianat and Michel W. Barsoum and Bahram Nabet},
  journal   = {Advanced Materials},
  pages     = {1903271},
  title     = {{Beyond Gold: Spin-Coated ${\mathrm{Ti}}_{3}{\mathrm{C}}_{2}$-Based {MXene} Photodetectors}},
  volume    = {31},
  year      = {2019},
  month     = {Sep},
  number    = {43},
  doi       = {10.1002/adma.201903271},
  publisher = {Wiley},
}

@Article{Hantanasirisakul_2016,
  author    = {Kanit Hantanasirisakul and Meng-Qiang Zhao and Patrick Urbankowski and Joseph Halim and Babak Anasori and Sankalp Kota and Chang E. Ren and Michel W. Barsoum and Yury Gogotsi},
  journal   = {Advanced Electronic Materials},
  pages     = {1600050},
  title     = {{Fabrication of ${\mathrm{Ti}}_{3}{\mathrm{C}}_{2}{\mathrm{Ti}}_{x}$ MXene Transparent Thin Films with Tunable Optoelectronic Properties}},
  volume    = {2},
  year      = {2016},
  month     = {Apr},
  number    = {6},
  doi       = {10.1002/aelm.201600050},
  publisher = {Wiley},
}

@Article{Naguib_2013,
  author    = {Michael Naguib and Vadym N. Mochalin and Michel W. Barsoum and Yury Gogotsi},
  journal   = {Advanced Materials},
  pages     = {992--1005},
  title     = {{25th Anniversary Article: {MXenes}: A New Family of Two-Dimensional Materials}},
  volume    = {26},
  year      = {2013},
  month     = {Dec},
  number    = {7},
  doi       = {10.1002/adma.201304138},
  publisher = {Wiley},
}

@Article{Jiang_2020,
  author    = {Xiantao Jiang and Artem V. Kuklin and Alexander Baev and Yanqi Ge and Hans {\AA}gren and Han Zhang and Paras N. Prasad},
  journal   = {Physics Reports},
  pages     = {1--58},
  title     = {{Two-dimensional {MXenes}: From morphological to optical, electric, and magnetic properties and applications}},
  volume    = {848},
  year      = {2020},
  month     = {Mar},
  doi       = {10.1016/j.physrep.2019.12.006},
  publisher = {Elsevier {BV}},
}

@Article{Ghidiu_2014,
  author    = {Michael Ghidiu and Maria R. Lukatskaya and Meng-Qiang Zhao and Yury Gogotsi and Michel W. Barsoum},
  journal   = {Nature},
  pages     = {78--81},
  title     = {Conductive two-dimensional titanium carbide `clay' with high volumetric capacitance},
  volume    = {516},
  year      = {2014},
  month     = {Nov},
  number    = {7529},
  doi       = {10.1038/nature13970},
  publisher = {Springer Science and Business Media {LLC}},
}

@Article{Jhon_2017,
  author    = {Young In Jhon and Joonhoi Koo and Babak Anasori and Minah Seo and Ju Han Lee and Yury Gogotsi and Young Min Jhon},
  journal   = {Advanced Materials},
  pages     = {1702496},
  title     = {{Metallic {MXene} Saturable Absorber for Femtosecond Mode-Locked Lasers}},
  volume    = {29},
  year      = {2017},
  month     = {Jul},
  number    = {40},
  doi       = {10.1002/adma.201702496},
  publisher = {Wiley},
}

@Article{Dillon_2016,
  author    = {Andrew D. Dillon and Michael J. Ghidiu and Alex L. Krick and Justin Griggs and Steven J. May and Yury Gogotsi and Michel W. Barsoum and Aaron T. Fafarman},
  journal   = {Advanced Functional Materials},
  pages     = {4162--4168},
  title     = {{Highly Conductive Optical Quality Solution-Processed Films of 2D Titanium Carbide}},
  volume    = {26},
  year      = {2016},
  month     = {Apr},
  number    = {23},
  doi       = {10.1002/adfm.201600357},
  publisher = {Wiley},
}

@Article{Naguib_2012,
  author    = {Michael Naguib and Olha Mashtalir and Joshua Carle and Volker Presser and Jun Lu and Lars Hultman and Yury Gogotsi and Michel W. Barsoum},
  journal   = {{ACS} Nano},
  pages     = {1322--1331},
  title     = {{Two-Dimensional Transition Metal Carbides}},
  volume    = {6},
  year      = {2012},
  month     = {Feb},
  number    = {2},
  doi       = {10.1021/nn204153h},
  publisher = {American Chemical Society ({ACS})},
}

@Article{Mauchamp_2014,
  author    = {Mauchamp, Vincent and Bugnet, Matthieu and Bellido, Edson P. and Botton, Gianluigi A. and Moreau, Philippe and Magne, Damien and Naguib, Michael and Cabioc'h, Thierry and Barsoum, Michel W.},
  journal   = {Physical Review B},
  pages     = {235428},
  title     = {{Enhanced and tunable surface plasmons in two-dimensional ${\mathrm{Ti}}_{3}{\mathrm{C}}_{2}$ stacks: Electronic structure versus boundary effects}},
  volume    = {89},
  year      = {2014},
  month     = {Jun},
  doi       = {10.1103/PhysRevB.89.235428},
  issue     = {23},
  numpages  = {6},
  publisher = {American Physical Society},
  url       = {https://link.aps.org/doi/10.1103/PhysRevB.89.235428},
}

@Article{Magne_2015,
  author    = {Magne, Damien and Mauchamp, Vincent and C\'el\'erier, St\'ephane and Chartier, Patrick and Cabioc'h, Thierry},
  journal   = {Physical Review B},
  pages     = {201409},
  title     = {{Spectroscopic evidence in the visible-ultraviolet energy range of surface functionalization sites in the multilayer ${\mathrm{Ti}}_{3}{\mathrm{C}}_{2}$ MXene}},
  volume    = {91},
  year      = {2015},
  month     = {May},
  doi       = {10.1103/PhysRevB.91.201409},
  issue     = {20},
  numpages  = {5},
  publisher = {American Physical Society},
  url       = {https://link.aps.org/doi/10.1103/PhysRevB.91.201409},
}

@Article{Satheeshkumar_2016,
  author    = {Elumalai Satheeshkumar and Taron Makaryan and Armen Melikyan and Hayk Minassian and Yury Gogotsi and Masahiro Yoshimura},
  journal   = {Scientific Reports},
  pages     = {32049},
  title     = {{One-step Solution Processing of Ag, Au and Pd@{MXene} Hybrids for {SERS}}},
  volume    = {6},
  year      = {2016},
  month     = {Aug},
  number    = {1},
  doi       = {10.1038/srep32049},
  publisher = {Springer Science and Business Media {LLC}},
}

@Article{Sarycheva_2017,
  author    = {Asia Sarycheva and Taron Makaryan and Kathleen Maleski and Elumalai Satheeshkumar and Armen Melikyan and Hayk Minassian and Masahiro Yoshimura and Yury Gogotsi},
  journal   = {The Journal of Physical Chemistry C},
  pages     = {19983--19988},
  title     = {{Two-Dimensional Titanium Carbide ({MXene}) as Surface-Enhanced Raman Scattering Substrate}},
  volume    = {121},
  year      = {2017},
  month     = {Sep},
  number    = {36},
  doi       = {10.1021/acs.jpcc.7b08180},
  publisher = {American Chemical Society ({ACS})},
}

@Article{Song_2019,
  author    = {Yufeng Song and Yunxiang Chen and Xiantao Jiang and Yanqi Ge and Yunzheng Wang and Kaixi You and Ke Wang and Jilin Zheng and Jianhua Ji and Yupeng Zhang and Jianqing Li and Han Zhang},
  journal   = {Advanced Optical Materials},
  pages     = {1801777},
  title     = {{Nonlinear Few-Layer {MXene}-Assisted All-Optical Wavelength Conversion at Telecommunication Band}},
  volume    = {7},
  year      = {2019},
  month     = {May},
  number    = {18},
  doi       = {10.1002/adom.201801777},
  publisher = {Wiley},
}

@Article{Soundiraraju_2017,
  author    = {Bhuvaneswari Soundiraraju and Benny Kattikkanal George},
  journal   = {{ACS} Nano},
  pages     = {8892--8900},
  title     = {{Two-Dimensional Titanium Nitride (${\mathrm{Ti}}_{2}{\mathrm{N}}$) {MXene}: Synthesis, Characterization, and Potential Application as Surface-Enhanced Raman Scattering Substrate}},
  volume    = {11},
  year      = {2017},
  month     = {Sep},
  number    = {9},
  doi       = {10.1021/acsnano.7b03129},
  publisher = {American Chemical Society ({ACS})},
}

@Article{El_Demellawi_2018,
  author    = {Jehad K. El-Demellawi and Sergei Lopatin and Jun Yin and Omar F. Mohammed and Husam N. Alshareef},
  journal   = {{ACS} Nano},
  pages     = {8485--8493},
  title     = {{Tunable Multipolar Surface Plasmons in 2D ${\mathrm{Ti}}_{3}{\mathrm{C}}_{2}{\mathrm{Ti}}_{x}$ {MXene} Flakes}},
  volume    = {12},
  year      = {2018},
  month     = {Jul},
  number    = {8},
  doi       = {10.1021/acsnano.8b04029},
  publisher = {American Chemical Society ({ACS})},
}

@Article{Chaudhuri_2018,
  author    = {Krishnakali Chaudhuri and Mohamed Alhabeb and Zhuoxian Wang and Vladimir M. Shalaev and Yury Gogotsi and Alexandra Boltasseva},
  journal   = {{ACS} Photonics},
  pages     = {1115--1122},
  title     = {{Highly Broadband Absorber Using Plasmonic Titanium Carbide ({MXene})}},
  volume    = {5},
  year      = {2018},
  month     = {Jan},
  number    = {3},
  doi       = {10.1021/acsphotonics.7b01439},
  publisher = {American Chemical Society ({ACS})},
}

@Article{Lashgari_2014,
  author    = {Hamed Lashgari and Mohammad Reza Abolhassani and Arash Boochani and S. Mohammad Elahi and Jabbar Khodadadi},
  journal   = {Solid State Communications},
  pages     = {61--69},
  title     = {{Electronic and optical properties of 2D graphene-like compounds titanium carbides and nitrides: {DFT} calculations}},
  volume    = {195},
  year      = {2014},
  month     = {Oct},
  doi       = {10.1016/j.ssc.2014.06.008},
  publisher = {Elsevier {BV}},
}

@Article{Berdiyorov_2016,
  author    = {G. R. Berdiyorov},
  journal   = {{AIP} Advances},
  pages     = {055105},
  title     = {{Optical properties of functionalized ${\mathrm{Ti}}_{3}{\mathrm{C}}_{2}{\mathrm{Ti}}_{2}$ (T = F, O, {OH}) {MXene}: First-principles calculations}},
  volume    = {6},
  year      = {2016},
  month     = {May},
  number    = {5},
  doi       = {10.1063/1.4948799},
  publisher = {{AIP} Publishing},
}

@Article{Bai_2016,
  author    = {Yuelei Bai and Kun Zhou and Narasimalu Srikanth and John H. L. Pang and Xiaodong He and Rongguo Wang},
  journal   = {{RSC} Advances},
  pages     = {35731--35739},
  title     = {Dependence of elastic and optical properties on surface terminated groups in two-dimensional {MXene} monolayers: a first-principles study},
  volume    = {6},
  year      = {2016},
  number    = {42},
  doi       = {10.1039/C6RA03090D},
  publisher = {Royal Society of Chemistry ({RSC})},
}

@Article{Xu_2000,
  author    = {Xu, Hongxing and Aizpurua, Javier and K\"all, Mikael and Apell, Peter},
  journal   = {Phys. Rev. E},
  pages     = {4318--4324},
  title     = {{Electromagnetic contributions to single-molecule sensitivity in surface-enhanced Raman scattering}},
  volume    = {62},
  year      = {2000},
  month     = {Sep},
  doi       = {10.1103/PhysRevE.62.4318},
  issue     = {3},
  numpages  = {0},
  publisher = {American Physical Society},
  url       = {https://link.aps.org/doi/10.1103/PhysRevE.62.4318},
}

@Article{Lukyanchuk_2010,
  author    = {Boris Luk'yanchuk and Nikolay I. Zheludev and Stefan A. Maier and Naomi J. Halas and Peter Nordlander and Harald Giessen and Chong Tow Chong},
  journal   = {Nature Materials},
  pages     = {707--715},
  title     = {{The Fano resonance in plasmonic nanostructures and metamaterials}},
  volume    = {9},
  year      = {2010},
  month     = {Aug},
  number    = {9},
  doi       = {10.1038/nmat2810},
  publisher = {Springer Science and Business Media {LLC}},
}

@Book{Bohren_1998,
  author    = {Craig F. Bohren and Donald R. Huffman},
  publisher = {Wiley},
  title     = {{Absorption and Scattering of Light by Small Particles}},
  year      = {1998},
  month     = {Apr},
  doi       = {10.1002/9783527618156},
}

@Article{Goncalves_2014,
  author    = {Manuel R. Gon{\c{c}}alves and Armen Melikyan and Hayk Minassian and Taron Makaryan and Othmar Marti},
  journal   = {Optics Express},
  pages     = {24516},
  title     = {{Strong dipole-quadrupole coupling and Fano resonance in H-like metallic nanostructures}},
  volume    = {22},
  year      = {2014},
  month     = {Sep},
  number    = {20},
  doi       = {10.1364/OE.22.024516},
  publisher = {The Optical Society},
}

@Article{Hantanasirisakul_2019,
  author    = {Kanit Hantanasirisakul and Mohamed Alhabeb and Alexey Lipatov and Kathleen Maleski and Babak Anasori and Pol Salles and Chanoknan Ieosakulrat and Pasit Pakawatpanurut and Alexander Sinitskii and Steven J. May and Yury Gogotsi},
  journal   = {Chemistry of Materials},
  pages     = {2941--2951},
  title     = {{Effects of Synthesis and Processing on Optoelectronic Properties of Titanium Carbonitride {MXene}}},
  volume    = {31},
  year      = {2019},
  month     = {Mar},
  number    = {8},
  doi       = {10.1021/acs.chemmater.9b00401},
  publisher = {American Chemical Society ({ACS})},
}

@Article{Spector_2020,
  author    = {Marat Spector and Angeleene S. Ang and Oleg V. Minin and Igor V. Minin and Alina Karabchevsky},
  journal   = {Nanoscale Advances},
  pages     = {5312--5318},
  title     = {{Photonic hook formation in near-infrared with {MXene} Ti3C2 nanoparticles}},
  volume    = {2},
  year      = {2020},
  number    = {11},
  doi       = {10.1039/D0NA00485E},
  publisher = {Royal Society of Chemistry ({RSC})},
  timestamp = {2021-01-14},
}

@Article{Christopoulos_2019,
  author    = {Thomas Christopoulos and Odysseas Tsilipakos and Georgios Sinatkas and Emmanouil E. Kriezis},
  journal   = {Optics Express},
  pages     = {14505},
  title     = {On the calculation of the quality factor in contemporary photonic resonant structures},
  volume    = {27},
  year      = {2019},
  month     = {may},
  number    = {10},
  doi       = {10.1364/OE.27.014505},
  publisher = {The Optical Society},
  timestamp = {2021-01-22},
}

@Comment{jabref-meta: databaseType:bibtex;}
