# Supplementary material
Source: MDPI journal article supplement (https://www.mdpi.com/2304-6732/8/2/36)
Supplement: s1 [file s1 › Supplementary_MG_et_al_revised_2.tex]

% ****** Start of file apssamp.tex ******
%
%   This file is part of the APS files in the REVTeX 4.2 distribution.
%   Version 4.2a of REVTeX, December 2014
%
%   Copyright (c) 2014 The American Physical Society.
%
%   See the REVTeX 4 README file for restrictions and more information.
%
% TeX'ing this file requires that you have AMS-LaTeX 2.0 installed
% as well as the rest of the prerequisites for REVTeX 4.2
%
% See the REVTeX 4 README file
% It also requires running BibTeX. The commands are as follows:
%
%  1)  latex apssamp.tex
%  2)  bibtex apssamp
%  3)  latex apssamp.tex
%  4)  latex apssamp.tex
%
\documentclass[%
% preprint,
%superscriptaddress,
%groupedaddress,
%unsortedaddress,
%runinaddress,
%frontmatterverbose, 
%preprint,
%preprintnumbers,
%nofootinbib,
%nobibnotes,
%bibnotes,
% amsmath,
% amssymb,
% aps,
%pra,
%prb,
%rmp,
%prstab,
%prstper,
 %floatfix,
 %superscriptaddress
]{article}

\usepackage{stix}% STIX fonts
\usepackage[utf8]{inputenc} 

\usepackage{graphicx}% Include figure files
\usepackage{dcolumn}% Align table columns on decimal point
\usepackage{bm}% bold math
%\usepackage{hyperref}% add hypertext capabilities
%\usepackage[mathlines]{lineno}% Enable numbering of text and display math
%\linenumbers\relax % Commence numbering lines

%\usepackage[showframe,%Uncomment any one of the following lines to test 
%%scale=0.7, marginratio={1:1, 2:3}, ignoreall,% default settings
%%text={7in,10in},centering,
%%margin=1.5in,
%%total={6.5in,8.75in}, top=1.2in, left=0.9in, includefoot,
%%height=10in,a5paper,hmargin={3cm,0.8in},
%]{geometry}

%\usepackage[numbers]{natbib}
\usepackage{natbib,hyperref}

\usepackage{amsmath}
\usepackage{float} %Taron added this for placing figure 7 after the section text

\newcommand{\TCT}{Ti$_\text{3}$C$_\text{2}$T$_\text{x}$}
\renewcommand{\thesection}{S\arabic{section}}
\renewcommand{\thefigure}{S\arabic{figure}}
\begin{document}

%\preprint{MXenes: SERS}

\title{{\bfseries Supplementary Information:}\\ Interband, surface plasmon and Fano resonances in titanium carbide (MXene) nanoparticles in the visible to infrared range}


\author{Manuel R. Gonçalves, Armen Melikyan, Hayk Minassian, \\ Taron Makaryan, Petros Petrosyan, Tigran Sargsian}


%\thanks{}%


%\date{\today}


\maketitle


\section{Analytical approach}
In order to use effectively the COMSOL Multiphysics\textsuperscript{\textregistered} package, we first
consider small nanoparticles and by applying quasistatic
approximation, analytically identify the wavelengths range where the
main peculiarities in optical spectra of MXene can appear. Wavelength
dependent absorbed energy per unit time (absorbed power) is:

\begin{equation}
  \tag{S1.1}
  Q(\lambda) = \frac{2\pi c}{\lambda}\cdot \Im[\alpha(\lambda)]\,|E_{0}|^{2} ,
\end{equation}
where $E_{0}$ is the incident electric field strength,
$\alpha(\lambda)$ is polarizability and $\omega$ is the angular
frequency of light For the following calculations we model the
synthesized MXene sheets as ellipsoids in a way that the shortest
semiaxes is equal to sheet thickness. In this case the polarizability
has a form~\cite{Bohren_1998}

\begin{equation}
  \tag{S1.2}
  \alpha_{L}(\lambda) = \frac{\epsilon(\lambda) - \epsilon_{m}}{\epsilon_{m} + L_{n}[\epsilon(\lambda) - \epsilon_{m}]}\cdot \frac{V}{4\pi} ,
\end{equation}
where $V$ is the particle volume, $\epsilon(\lambda)$ is the
dielectric function of the MXene~\cite{Dillon_2016} and $\epsilon_{m}$ is the dielectric permittivity
of the surrounding medium,  is the depolarization factor. When the
electric field of the incident light is directed along one of the axes
of ellipsoid  the depolarization factor $L_{n}$  becomes~\cite{Bohren_1998}

\begin{equation}
  \tag{S1.3}
  L_{n} = \frac{1}{2} a_{1} a_{2} a_{3} \int_{0}^{\infty} \frac{\d x}{(x + a_{n}^{2})\sqrt{(x + a_{1}^{2})(x + a_{2}^{2})(x + a_{3}^{2})}} ,
\end{equation}
where $a_{n}$ are semiaxes of ellipsoid. Performing integration in (S3) we obtain
absorption spectra $Q(\lambda)$ for all three polarizations of incident light. In
the limits of quasistatic approximation, independent from the
ellipsoid sizes there always appear two absorption maxima which
correspond to IBT and SP. For example, in case of $a_{1} = 5$ nm, $a_{2} = 15$ nm and $a_{3} = 30$ nm,
the calculated absorption spectra are presented in the Fig. S1 a), b) and c). The
maxima at shortest wavelengths for all three polarizations correspond
to IBT, whereas the maxima at longer wavelengths correspond to SPs and
strongly differ from each other by position and height. The right
peaks on Fig. S1 a) and b) correspond to TSPs while in Fig. S1 c) the right peak describes LSP.

%%% Figure S1
\begin{figure}
  \includegraphics[width=.85\textwidth]{FIGURES/FigS1.eps}
  \caption{\label{fig:S1} Absorbed power in a small ellipsoidal MXene particle for three polarizations. Electric field direction: A) along $a_{1}$, B) along $a_{2}$ and C) along $a_{3}$.}
\end{figure}

Differences in heights in the Figs S1 a), b) and c) are conditioned by
the values of corresponding polarizabilities, that vary with the
length of the axis. Namely the longer the axis, the larger the
polarizability and this peculiarity causes the differences in heights
and magnitudes of redshifts in absorption spectra. Importantly, the peak positions of IBT in Figs S1 a), b) and c) change from 660 nm to 750 nm,  which is a consequence of strong influence from higher SP peaks (“attraction” of peaks). The “attraction” of peaks is pure mathematical phenomenon, which is a result of simple overlapping of slopes of two neighboring peaks. Note that in Figs. S1 a) and c) the right hand side peaks are relatively strong. In these cases, in the vicinity of IBT peaks the slops of right hand side stronger SP peaks being increasing functions, overlap with IBT slops. That is why the addition of these two curves cause redshift.  For the particular case when the MXene sheet can be approximated
as a small spheroid ($a_{1} = a_{2} = a$) the depolarization factor becomes

\begin{equation}
  \tag{S1.4}  
  L_{2} = \frac{1}{2\xi^{2}}\left[(1 + \xi^{2})\arctan\xi \right],
\end{equation}
where the spheroid eccentricity $\xi = a/\sqrt{a_{3}^{2} - a}$.  Next, inserting the measured values of $\epsilon(\omega)$ into equations (S1.1)-(S1.4), polarization dependent absorption spectra can be calculated.
For example, for the spheroid of sizes $a_{3} = 40$ nm and $a = 5$ nm, we obtain
for IBT and LSP resonance wavelengths 780 nm and 2100 nm, respectively. The
electric field intensity maps for identified two wavelengths are
presented above.
           
\section{COMSOL Multiphysics\textsuperscript{\textregistered} based simulations and method}
COMSOL Multiphysics\textsuperscript{\textregistered} is a computational software package which includes a module (called RF) for electromagnetics and optics calculations. Numerically, it is based on the finite element method. The computational domain is spherical. Scattering boundary conditions are applied to the boundary (outer spherical surface) of this domain. Inside the boundary, a perfectly-matched layer (PML) of 200 nm thickness is used to damp the scattered waves from the particles. The calculation of the absorption cross-section and near-fields of MXene spheroid and ellipsoids are performed on single, or multiple particles in homogeneous environment of refractive index n = 1.
The surface of the particles is described by a triangular or quadratic mesh. The mesh size is adapted for each particle size in order to achieve convergent results and not to exceed the computer memory. The incident field is a plane wave. COMSOL solves the Maxwell's equations for the computational domain using the refractive indices of the materials inside, using the scattering field formulation.
A sweep on frequency covering the defined region of the refractive index of the MXenes is done to obtain the near-field and the far-field distribution near the particles and the scattering cross-section.

%%% Figure S2
\begin{figure}
  \includegraphics[width=.75\textwidth]{FIGURES/FigS2_ANN.eps} 
  %\begin{tabular}{cc}
  %  \includegraphics[width=.75\textwidth]{FIGURES/FigS2_1.png} &
  %  \includegraphics[width=.475\textwidth]{FIGURES/FigS2_2.eps}
  %\end{tabular}
  \caption{\label{fig:S2} Electric field intensity map of a small spheroid at $\lambda = 780$ nm (a) and $\lambda = 2100$ nm (b).
The presented above results in the part 1 of SI are exploited throughout the sections 2 and 3 of the main article for the identification of the ranges of resonance wavelengths corresponding to IBT and LSPs in single particles of various shapes.}
\end{figure}

%%% Figure S3
\begin{figure}
  \includegraphics[width=.85\textwidth]{FIGURES/FigS3.eps}
  \caption{\label{fig:S3} Simulated absorption cross-section (CS) of a \TCT~disk of 1000 nm diameter with height 14 nm. The incident electric field is perpendicular to the base of the disk.}
\end{figure}

%%% Figure S4
\begin{figure}
  \begin{tabular}{cc}
    \includegraphics[width=.85\textwidth]{FIGURES/FigS4_ANN.eps} 
    % & \includegraphics[width=.475\textwidth]{FIGURES/FigS4_2.eps}
  \end{tabular}
  \caption{\label{fig:S4} Simulated absorption CS of \TCT~cylinder of diameter 500 nm with height 200 nm (red curve) and 300 nm (blue curve). The electric field is parallel to the base of cylinder.}
\end{figure}                                                          

%%% Figure S5
\begin{figure}
  \includegraphics[width=.85\textwidth]{FIGURES/FigS5_ANN.eps}
  \caption{\label{fig:S5} Simulated absorption CS of \TCT~disk of diameter 500 nm with height of 300 nm. Electric field is perpendicular to the base of disk. Inset: electric field intensity map of cylinder of diameter 500 nm with height 300 nm at the wavelength of TSP resonance - 1200 nm.}
\end{figure}

%%% Figure S6
\begin{figure}
  \includegraphics[width=.85\textwidth]{FIGURES/FigS6_ANN.eps}
  \caption{\label{fig:S6} Simulated absorption CS of a single \TCT~ellipsoid of semiaxes $a_{3} = 100$ nm, $a_{2} = 40$ nm and $a_{1} = 10$ nm. Insets: electric field intensity maps at 780 nm and 1840 nm.}
\end{figure}

\newpage

\section{Occurrence of Fano resonance}
In the physical picture described below, each
arrow shows the direction of displacement of positive charge at instantaneous time.
Interestingly, dipole plasmons oscillate in-phase,
whereas the quadrupole plasmons oscillating counter-phase generate in
their turn transversal plasmons also oscillating counter-phase.
In fact, strong hybridization caused by attraction of TSP modes in two
particles leads to strong red shift of transversal oscillation
wavelength of coupled system, which makes up to 500 nm (see Fig. 9).


%%% Figure S7
\begin{figure}[H] %Taron added [H] [here] to force the figure exit the floating mode, and hence be placed after the section and not before it. 
  \includegraphics[width=.85\textwidth]{FIGURES/FigS7_ANN.eps}
  \caption{\label{fig:S7} Schematic representation of three plasmon modes in each spheroid: dipole (blue), quadrupole (green) and transversal (red).}
  
\end{figure}

\newpage
\bibliographystyle{unsrt}
\bibliography{BIB/mxenes_bib}% Produces the bibliography via BibTeX.


\end{document}
%
% ****** End of file apssamp.tex ******
