# Supplementary material
Source: MDPI journal article supplement (https://www.mdpi.com/2304-6732/8/2/36)

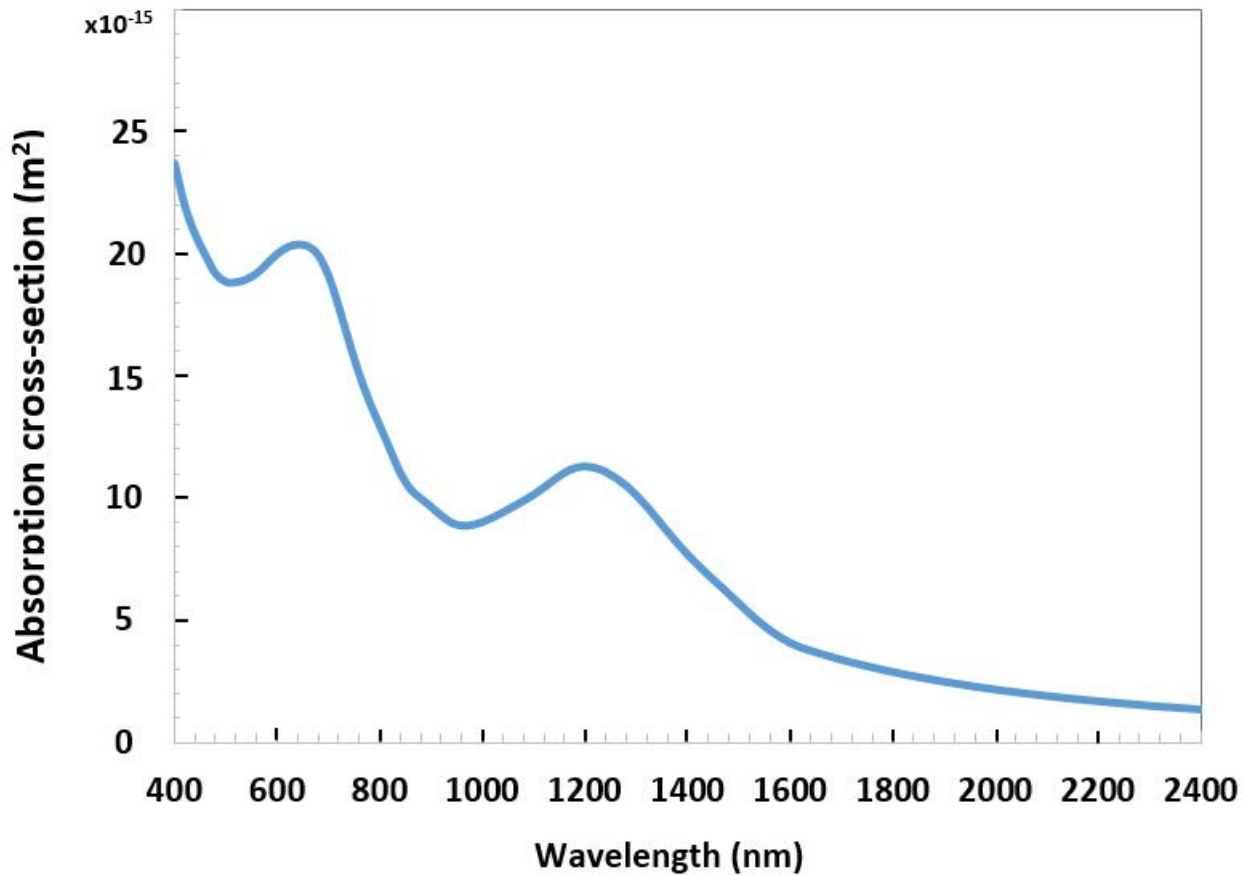

Supplement: s1 [file s1]

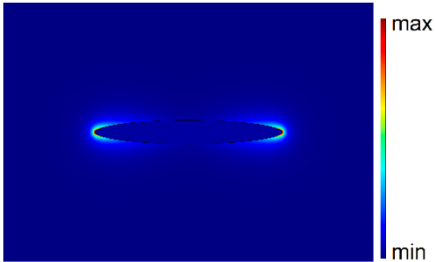

Supplement: s1 [file s1]

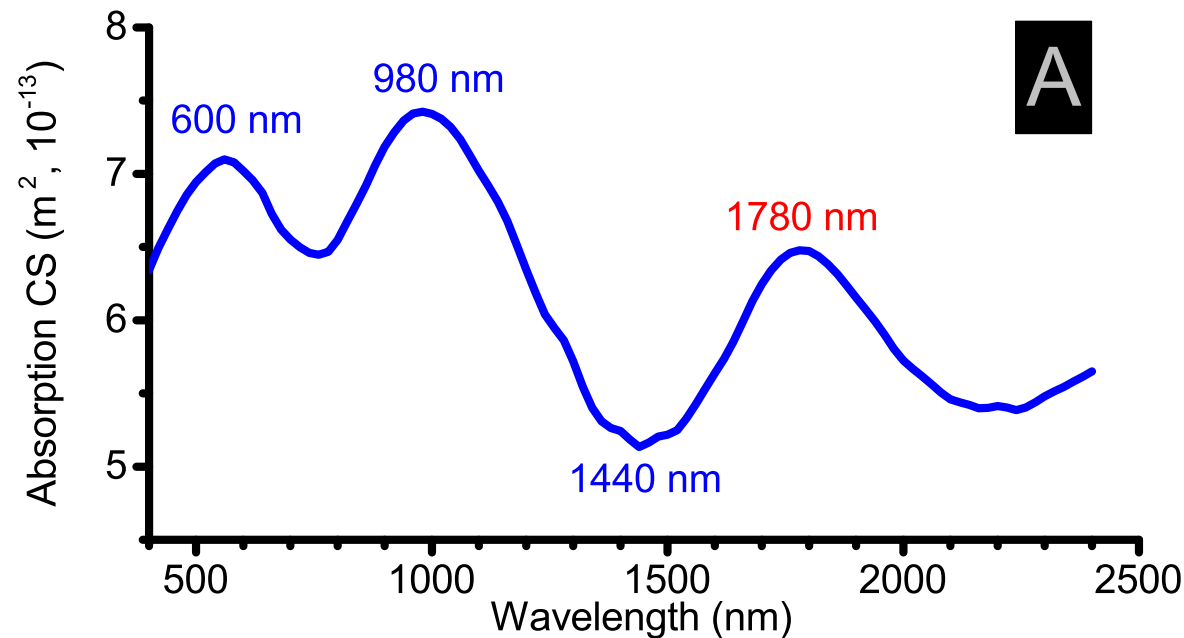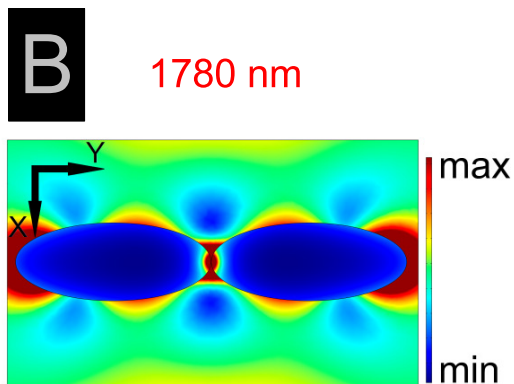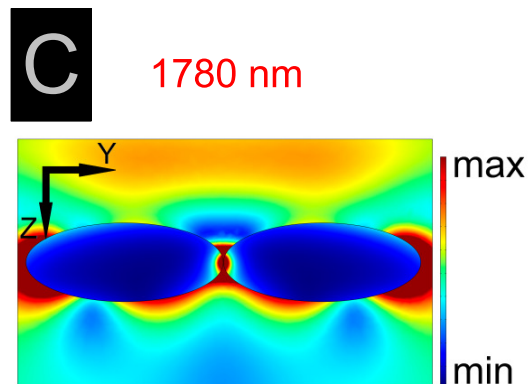

Supplement: s1 [file s1]

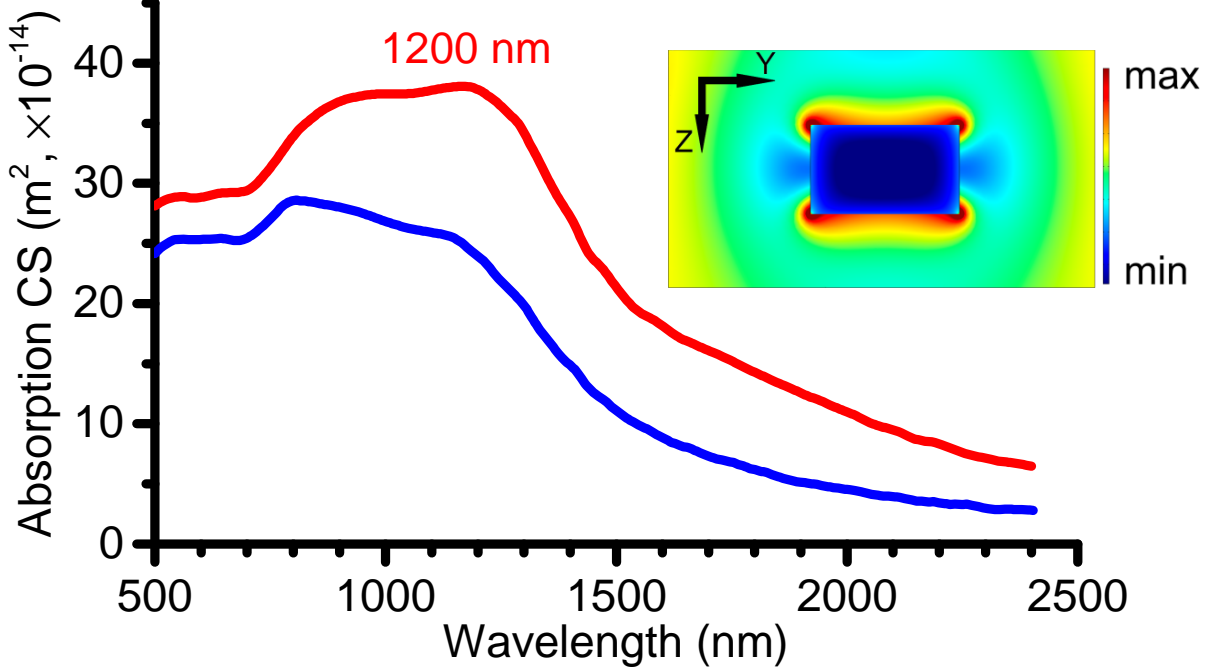

Supplement: s1 [file s1]

B

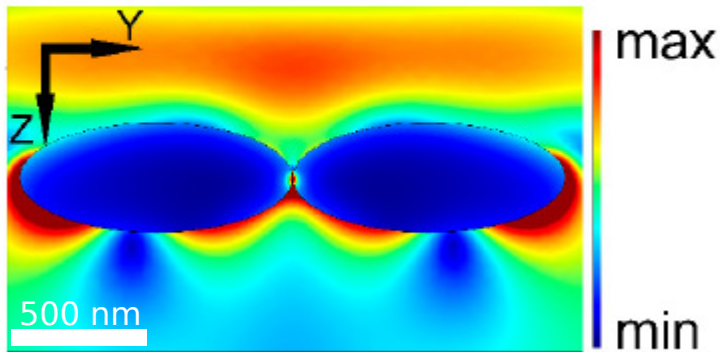

Supplement: s1 [file s1]

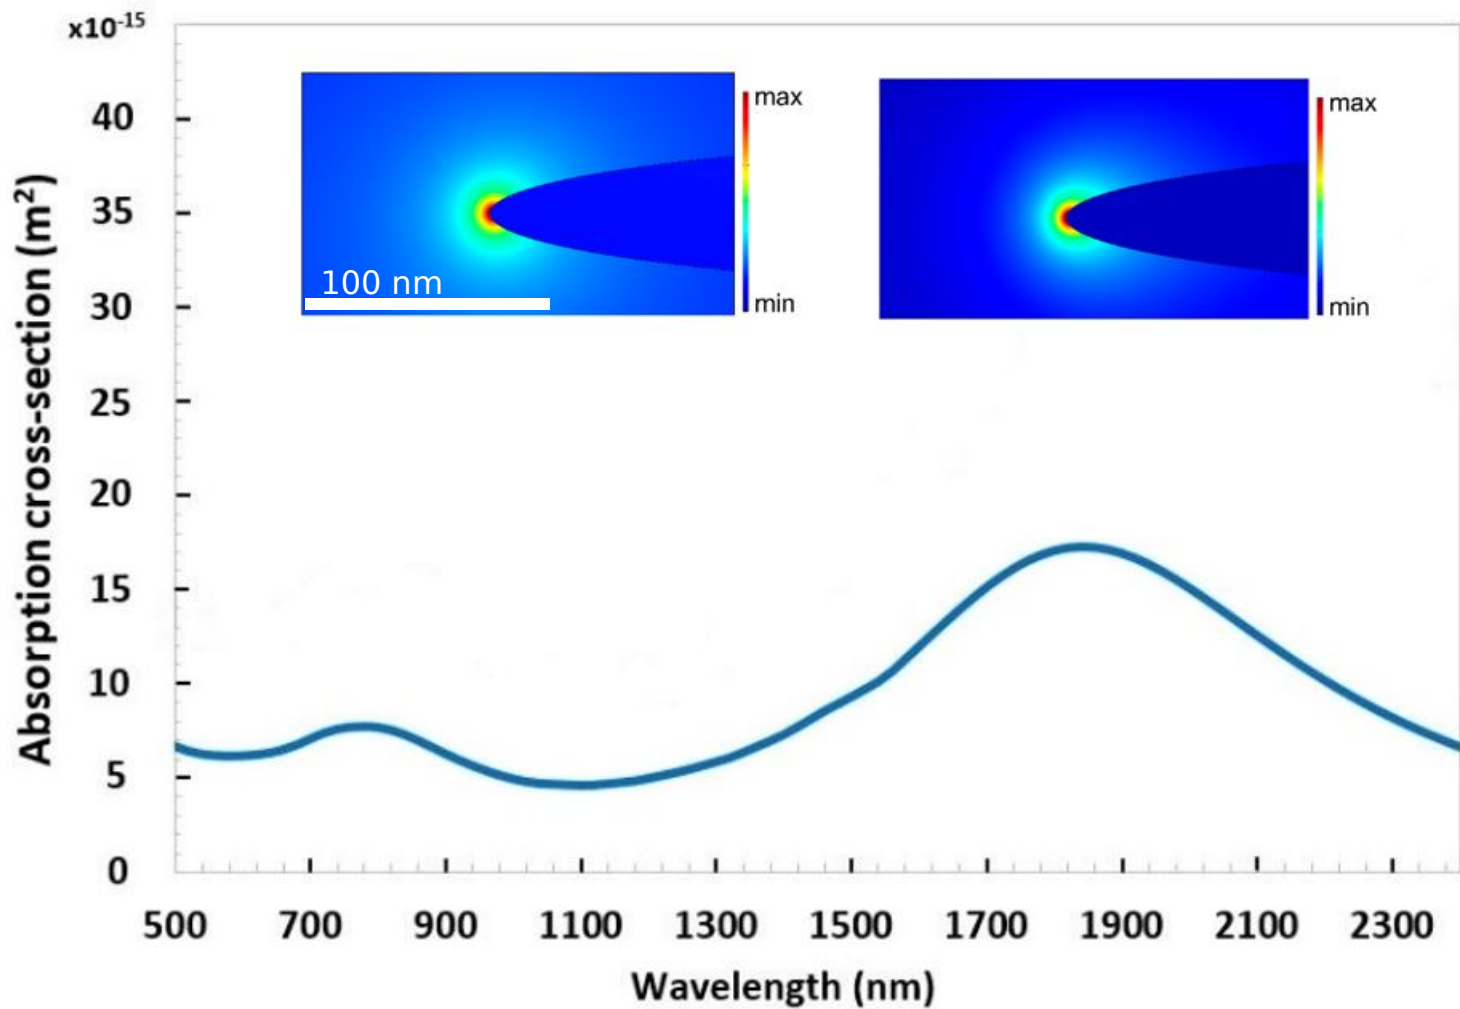

Supplement: s1 [file s1]

B

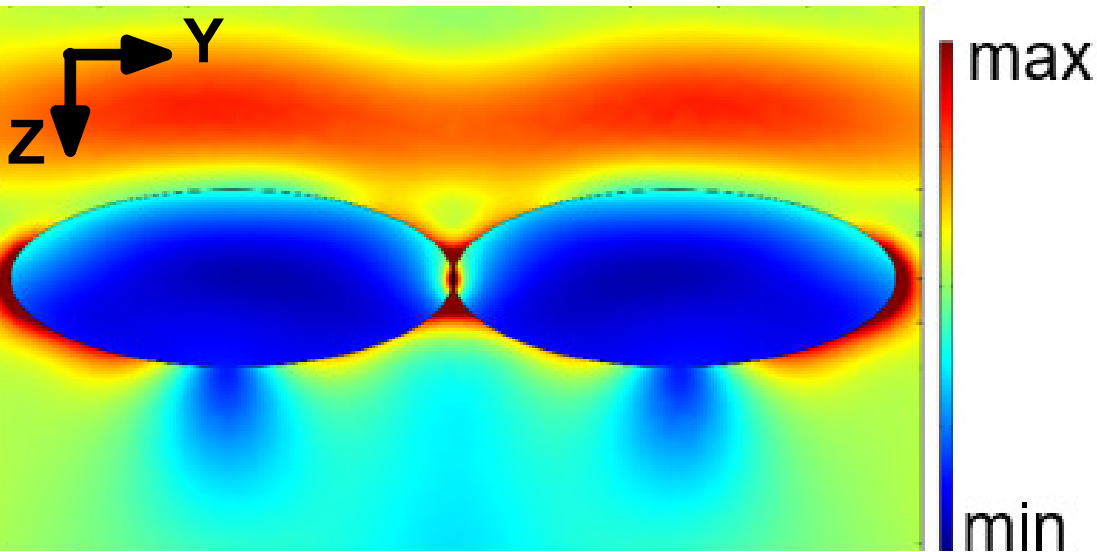

Supplement: s1 [file s1]

A

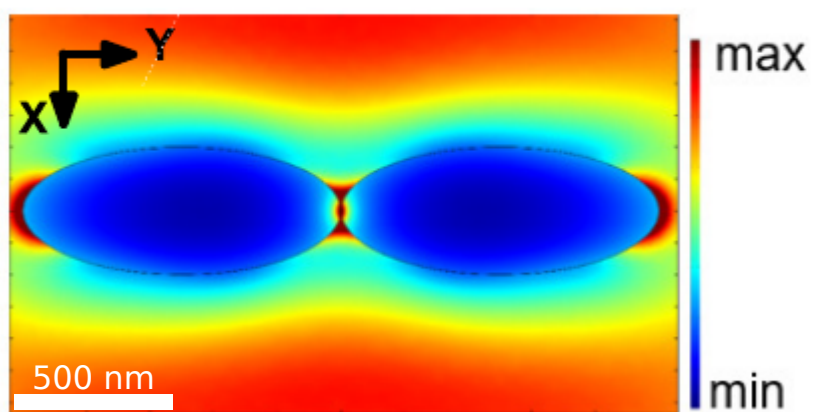

Supplement: s1 [file s1]

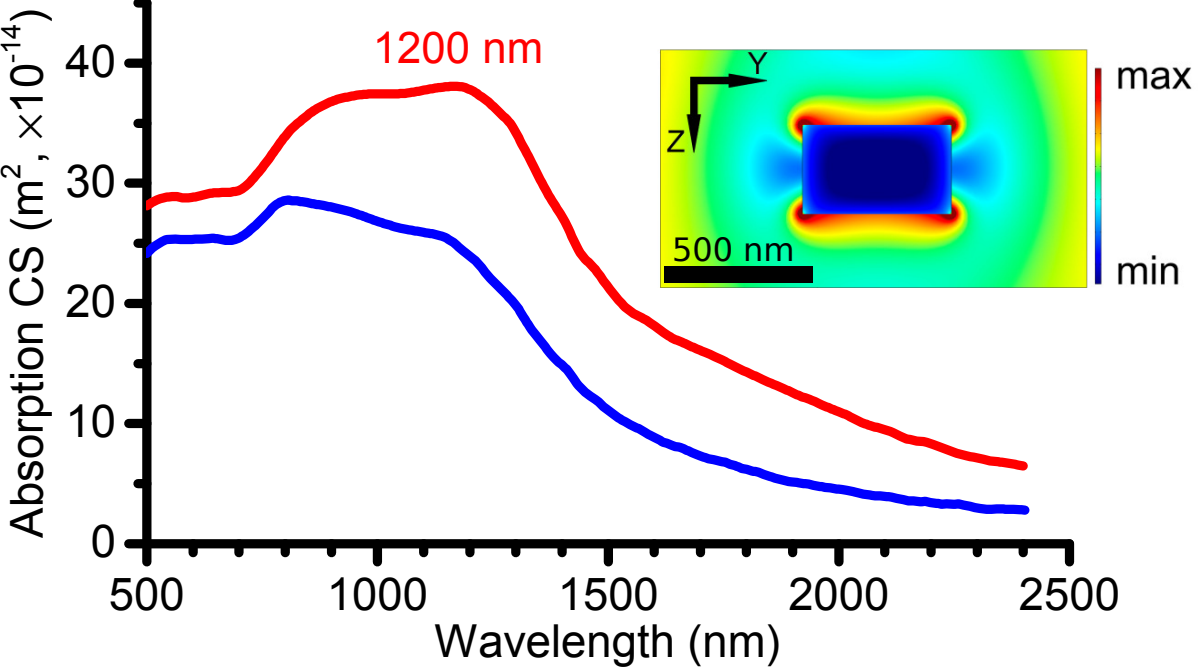

Supplement: s1 [file s1]

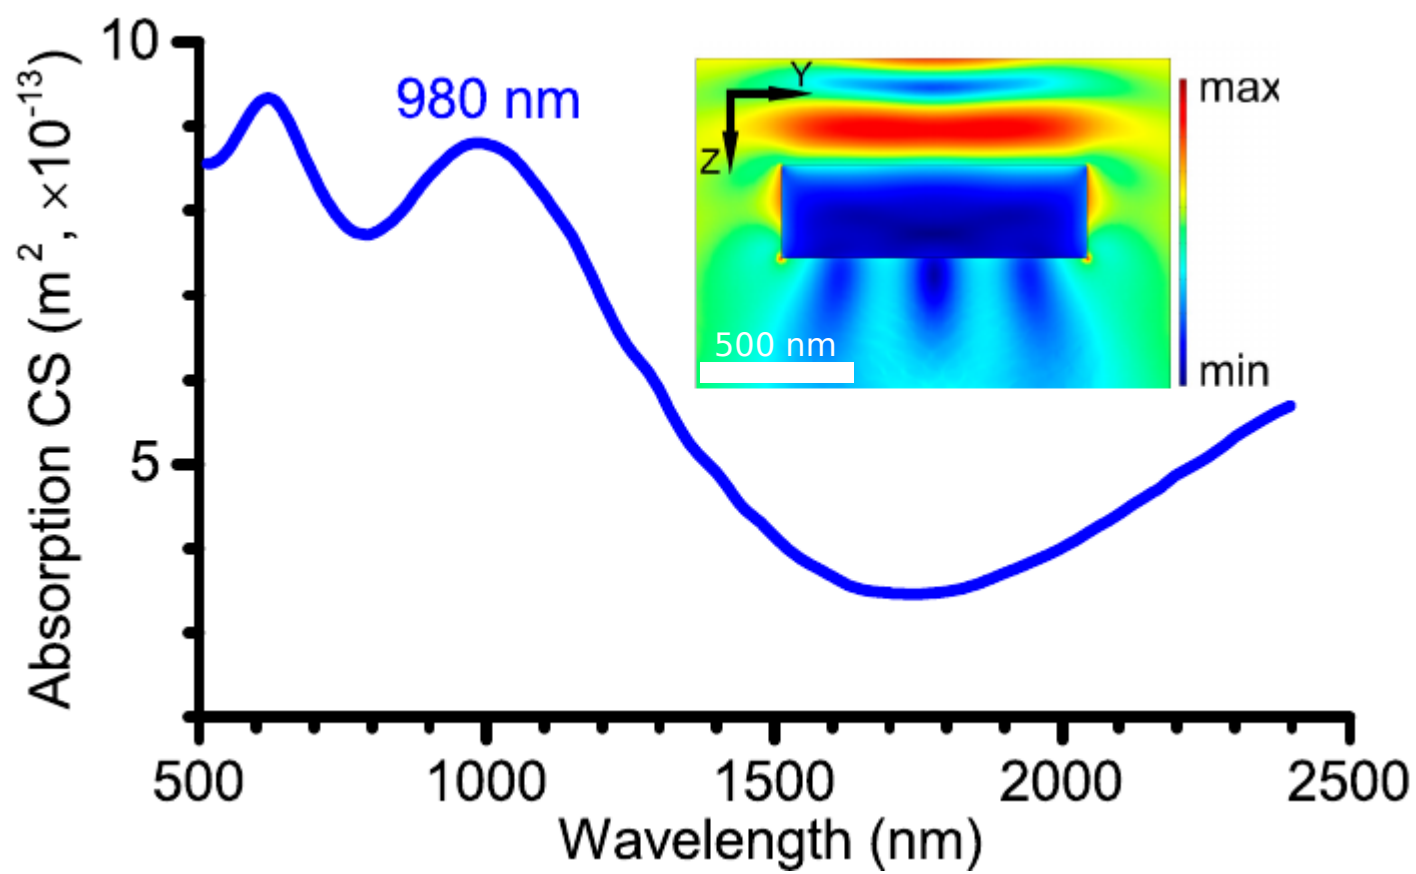

Supplement: s1 [file s1]

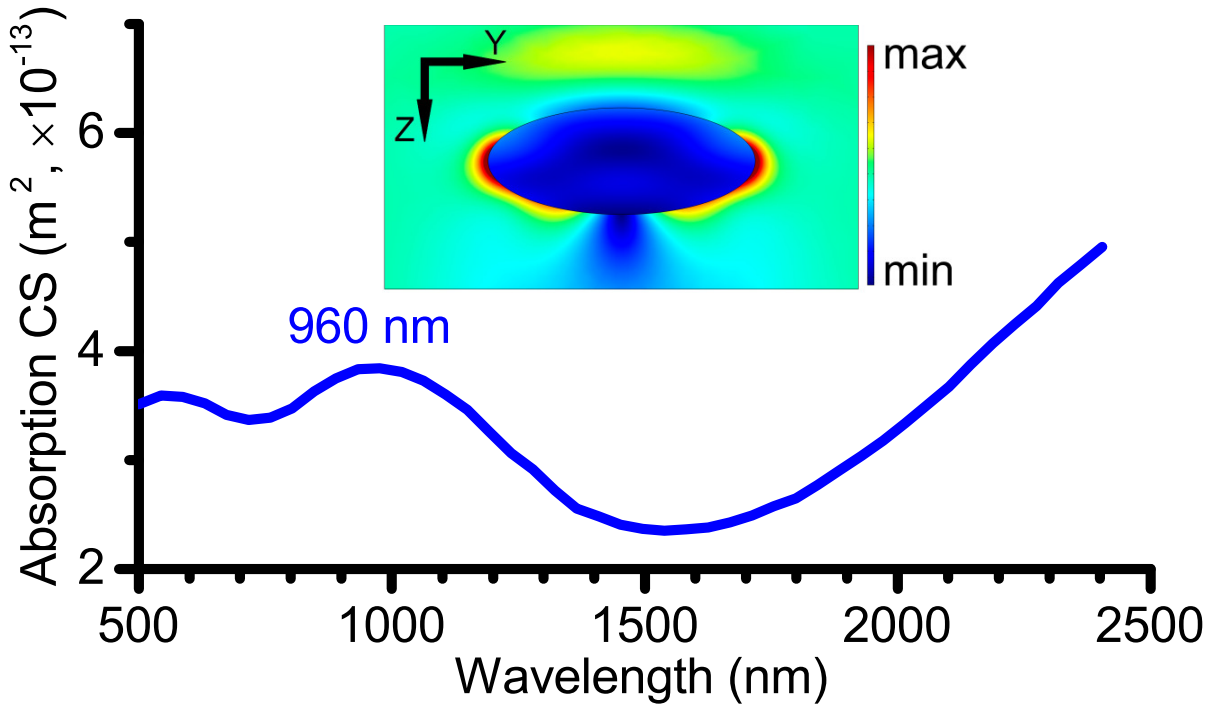

Supplement: s1 [file s1]

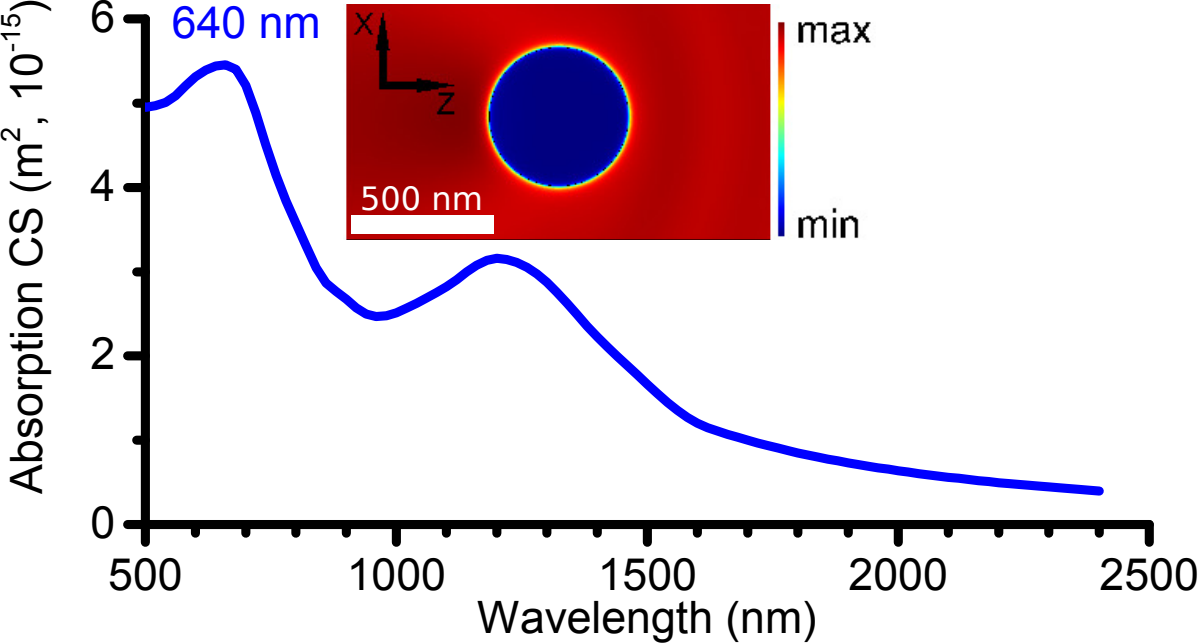

Supplement: s1 [file s1]

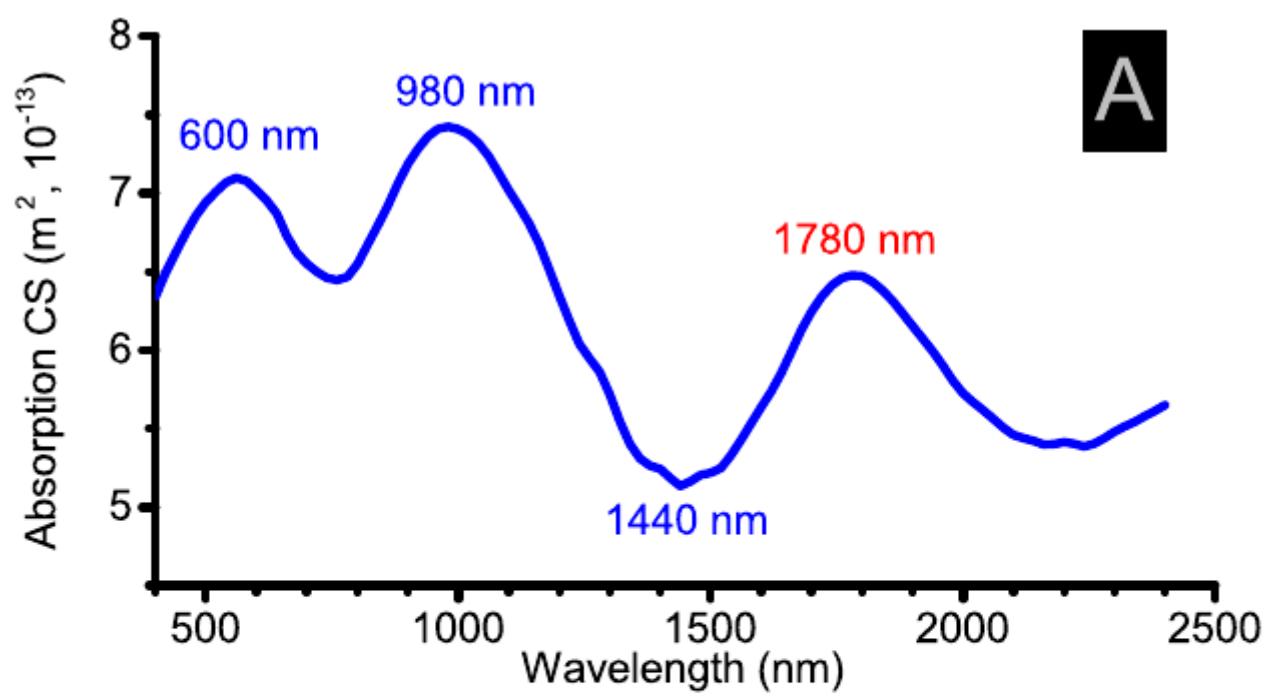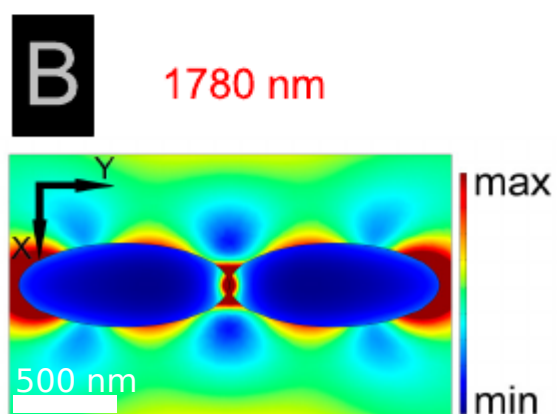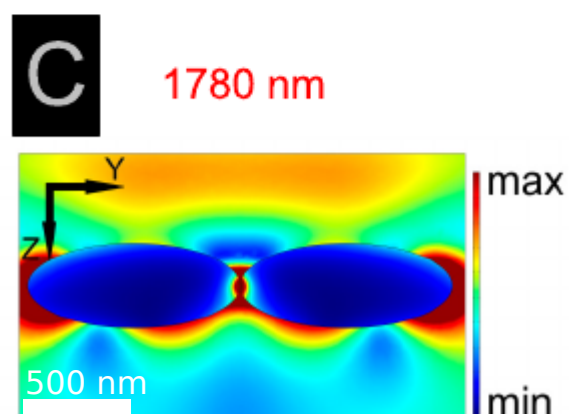

Supplement: s1 [file s1]

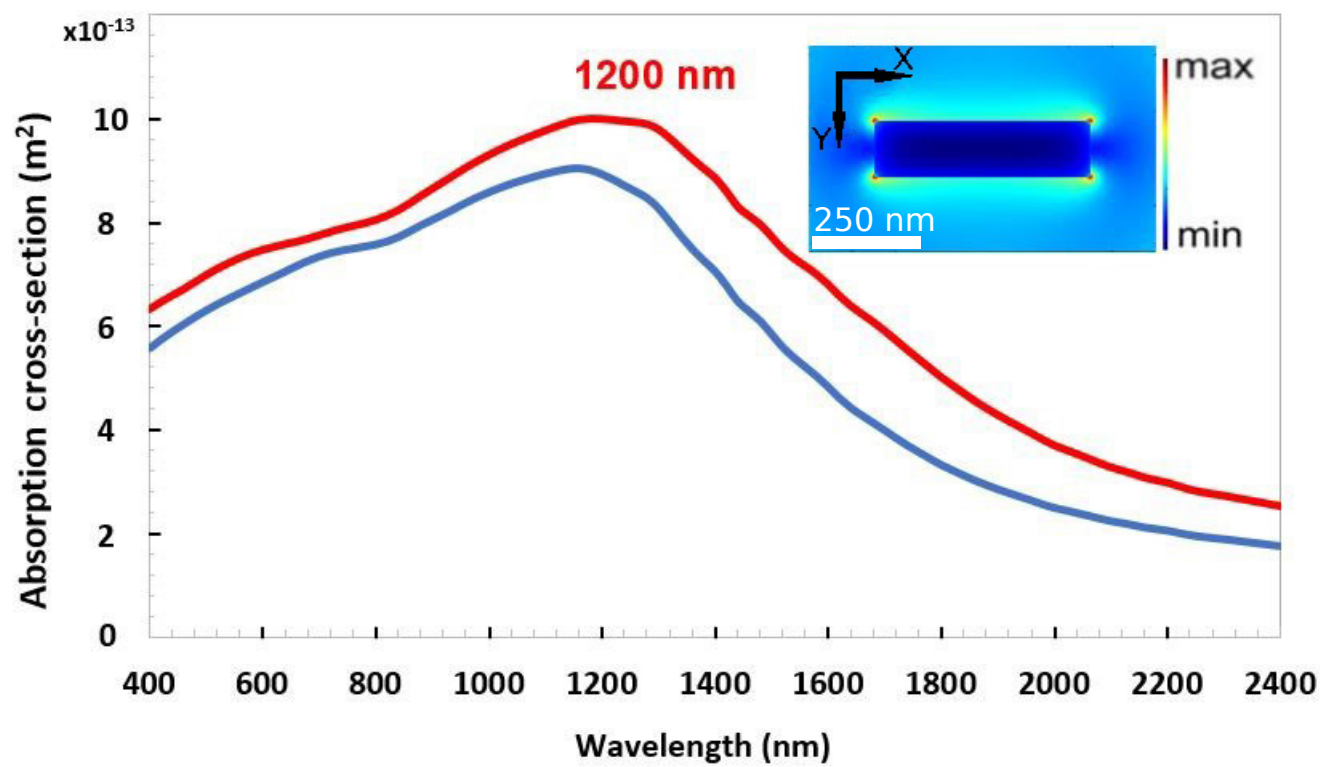

Supplement: s1 [file s1]

A

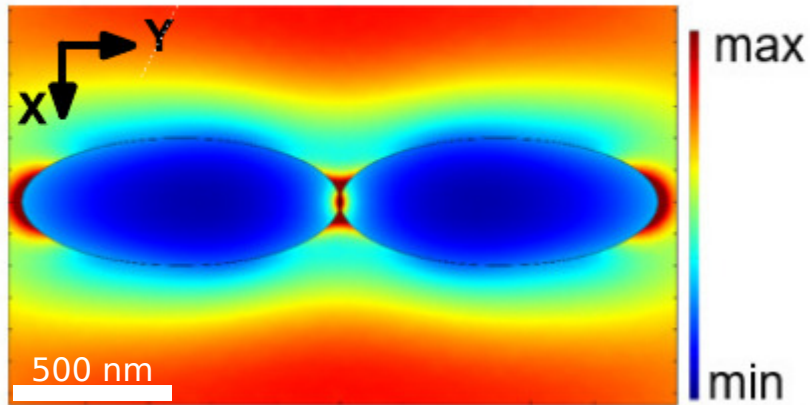

Supplement: s1 [file s1]

A

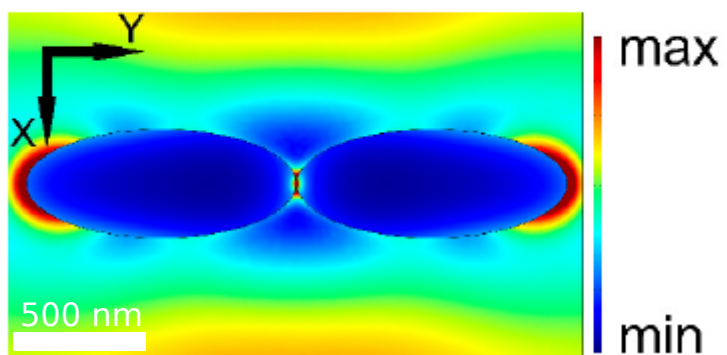

Supplement: s1 [file s1]

A

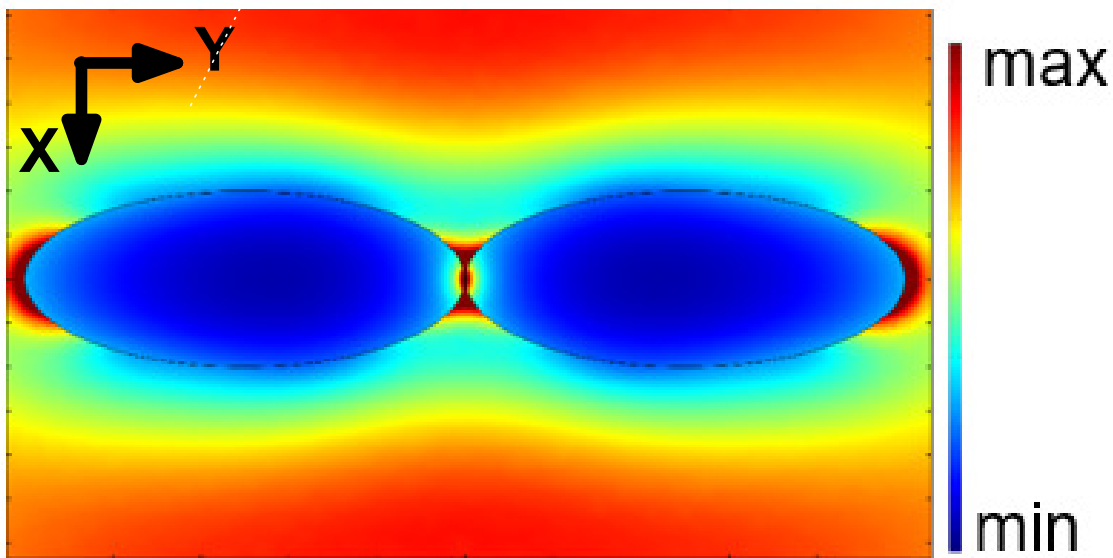

Supplement: s1 [file s1 › FIGURES/Fig10_A-eps-converted-to.pdf]

B

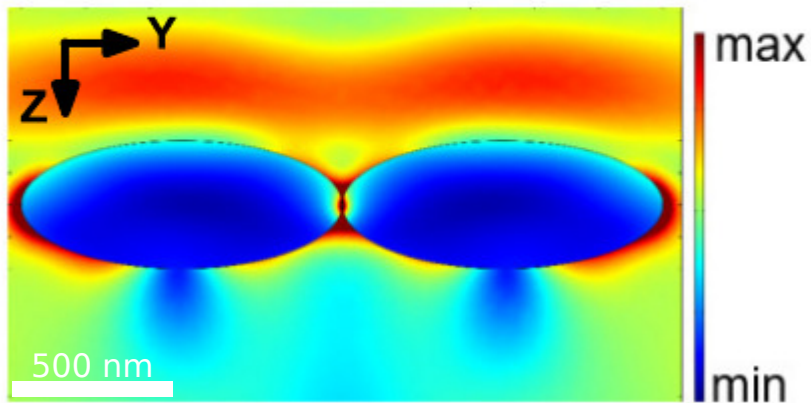

Supplement: s1 [file s1 › FIGURES/Fig10_B_ANN-eps-converted-to.pdf]

**B**

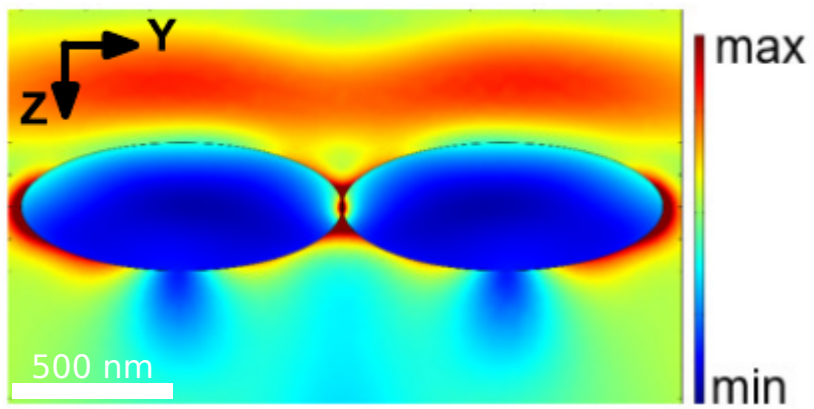

Supplement: s1 [file s1 › FIGURES/Fig10_B_ANN.pdf]

A

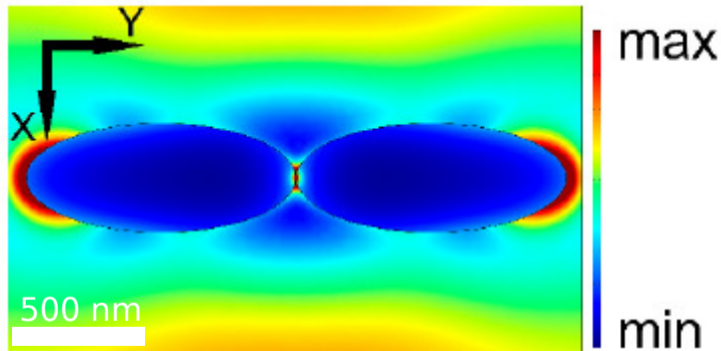

Supplement: s1 [file s1 › FIGURES/Fig11_A_ANN-eps-converted-to.pdf]

A

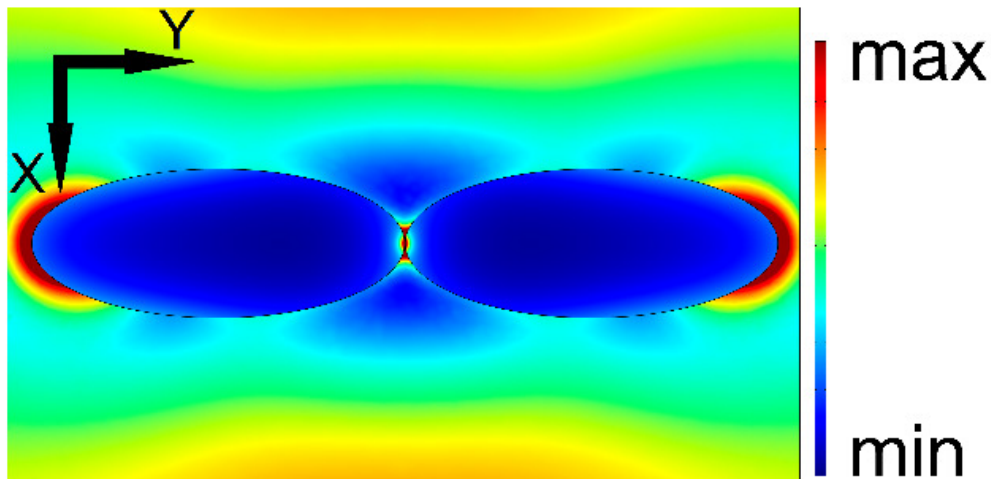

Supplement: s1 [file s1 › FIGURES/Fig11_A-eps-converted-to.pdf]

**B**

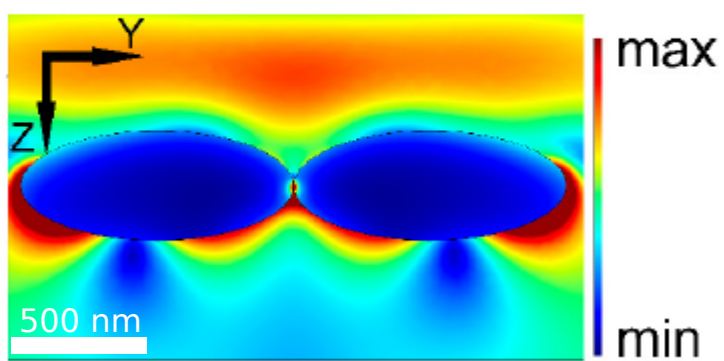

Supplement: s1 [file s1 › FIGURES/Fig11_B_ANN.pdf]

B

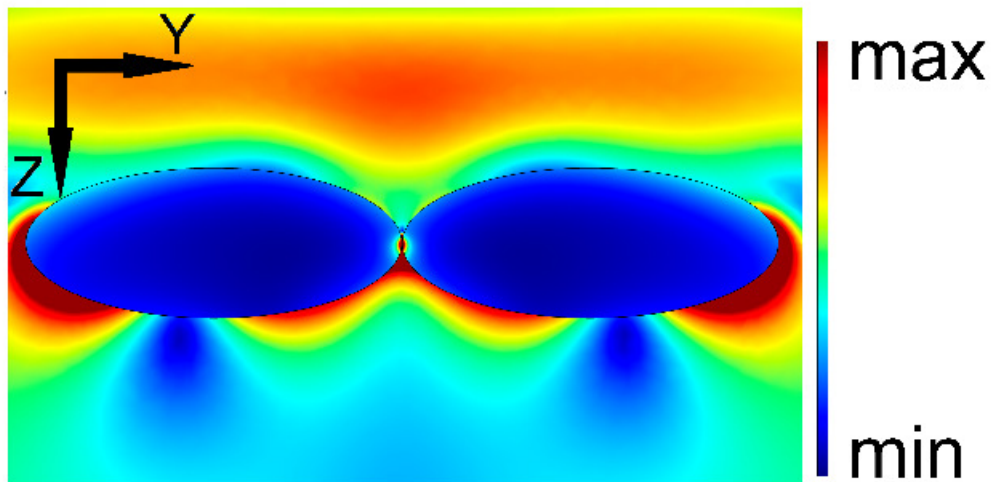

Supplement: s1 [file s1 › FIGURES/Fig11_B-eps-converted-to.pdf]

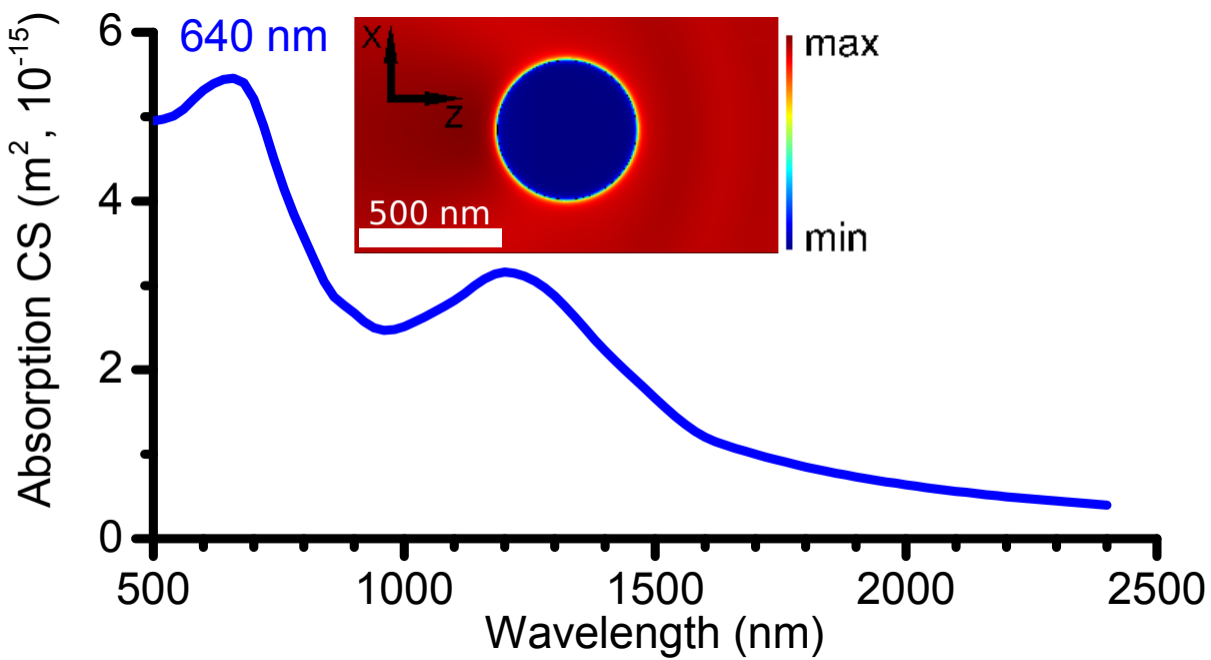

Supplement: s1 [file s1 › FIGURES/Fig1_ANN.pdf]

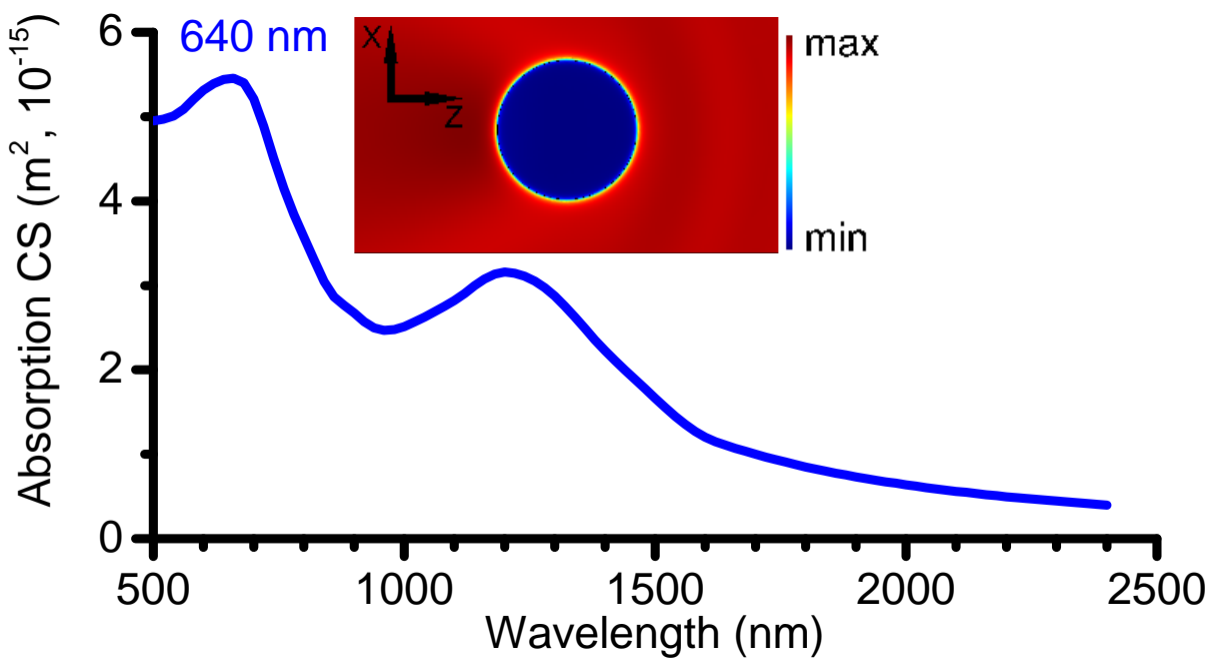

Supplement: s1 [file s1 › FIGURES/Fig1.pdf]

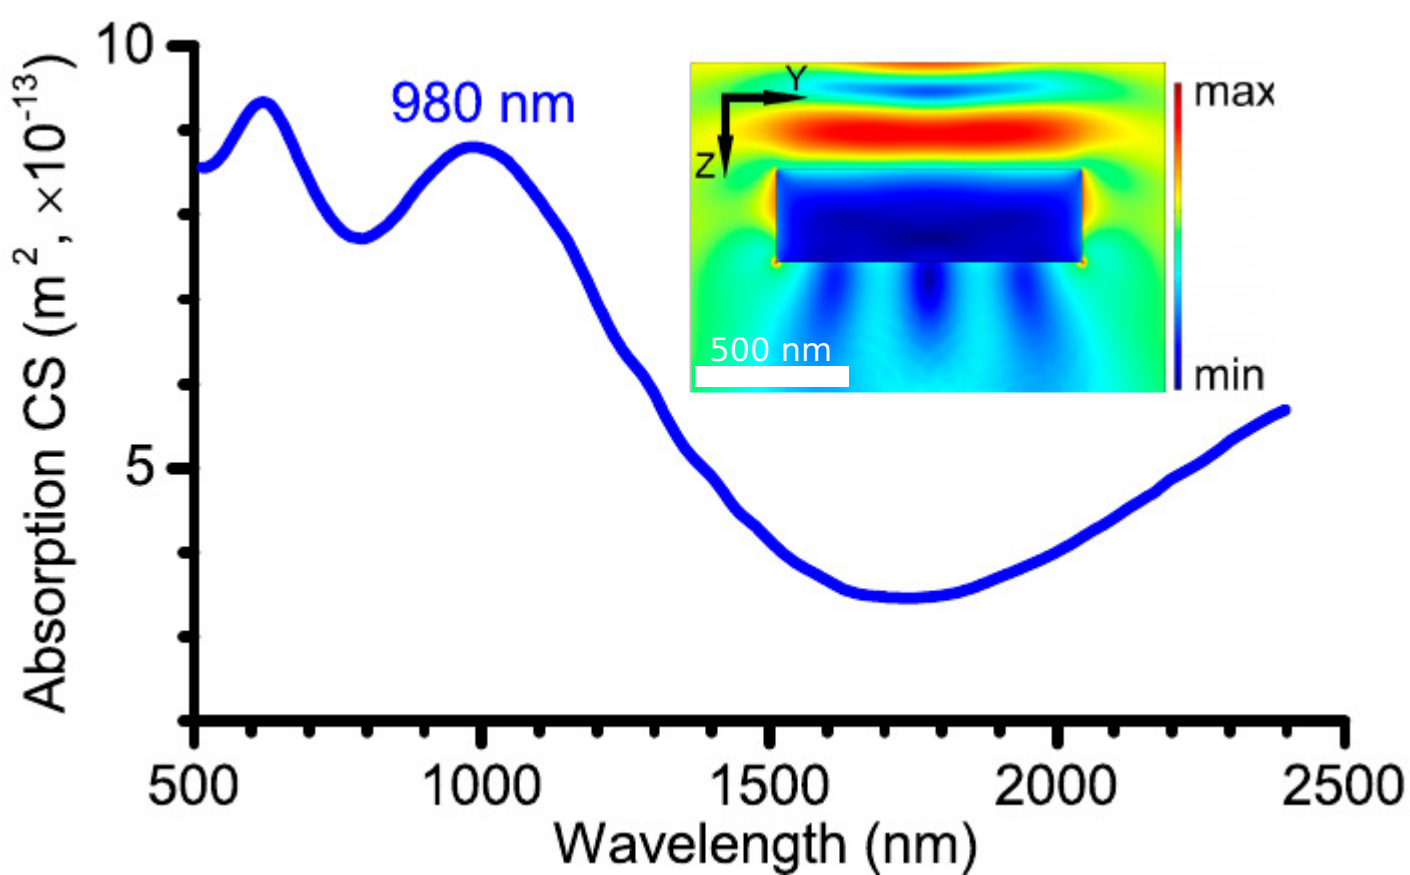

Supplement: s1 [file s1 › FIGURES/Fig2_ANN-eps-converted-to.pdf]

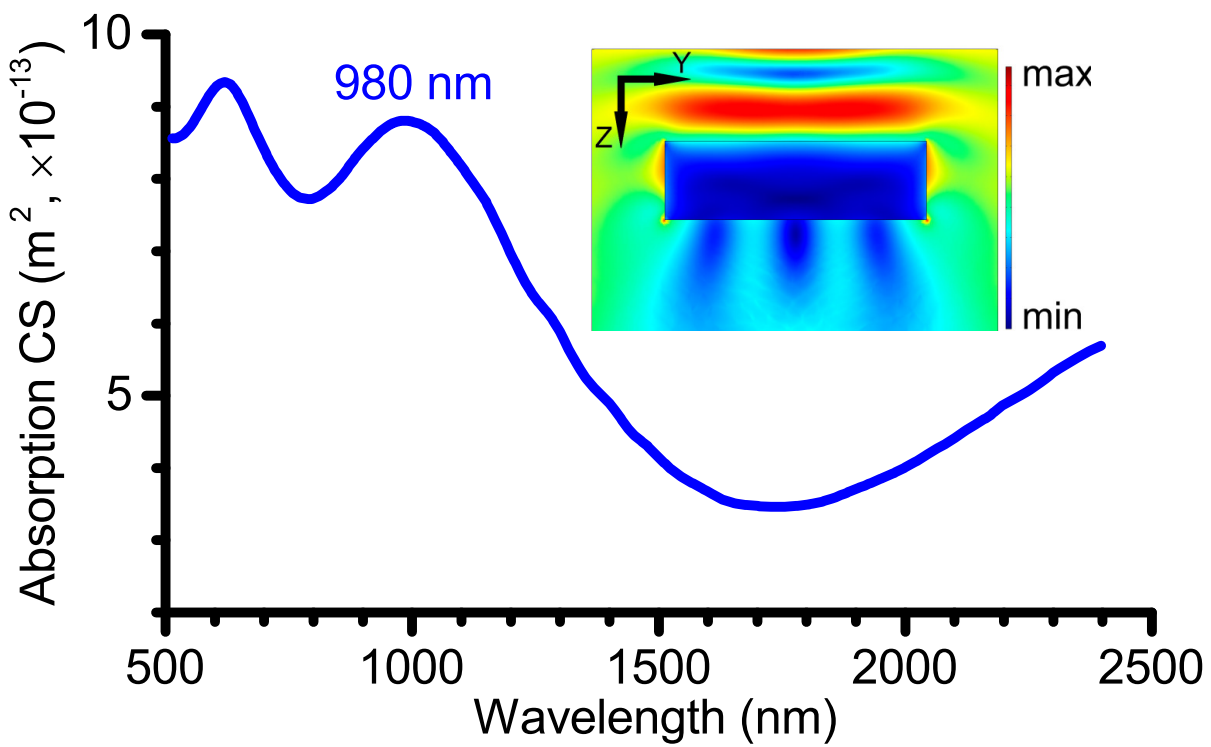

Supplement: s1 [file s1 › FIGURES/Fig2-eps-converted-to.pdf]

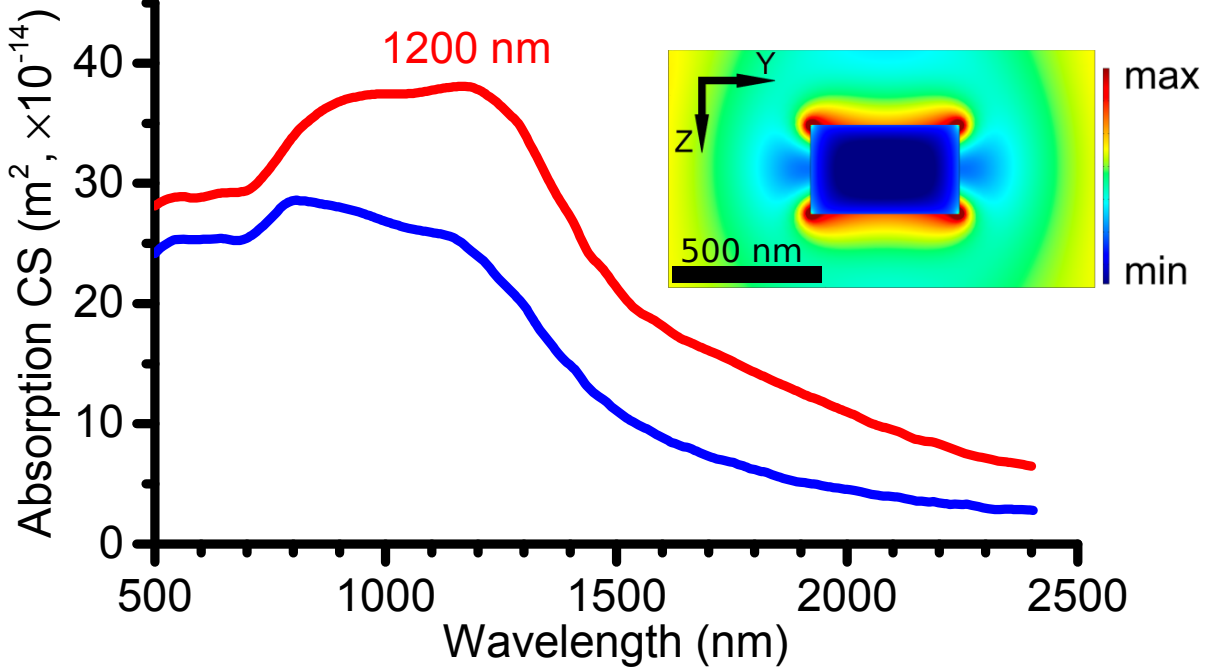

Supplement: s1 [file s1 › FIGURES/Fig3_ANN.pdf]

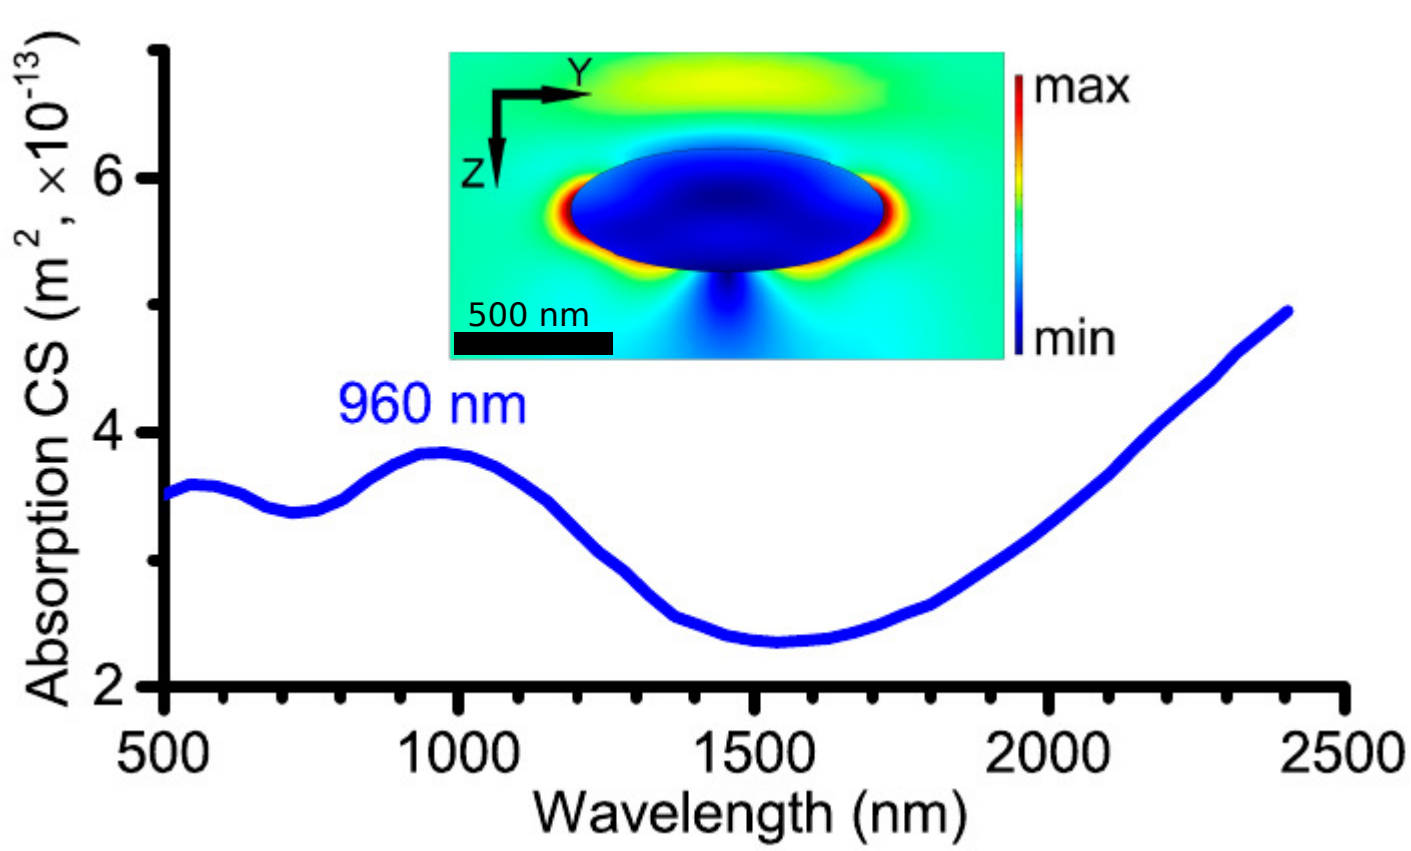

Supplement: s1 [file s1 › FIGURES/Fig4_ANN-eps-converted-to.pdf]

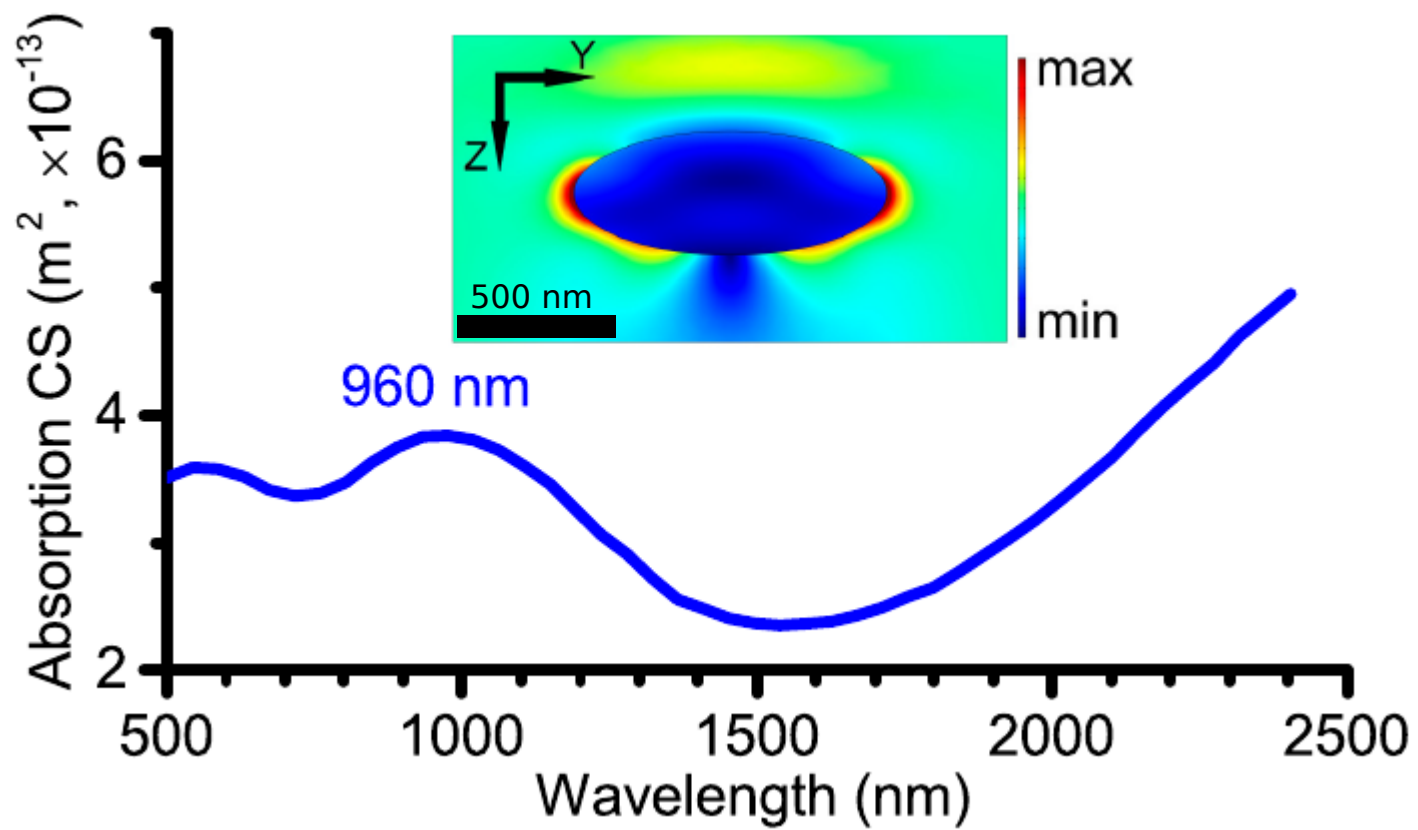

Supplement: s1 [file s1 › FIGURES/Fig4_ANN.pdf]

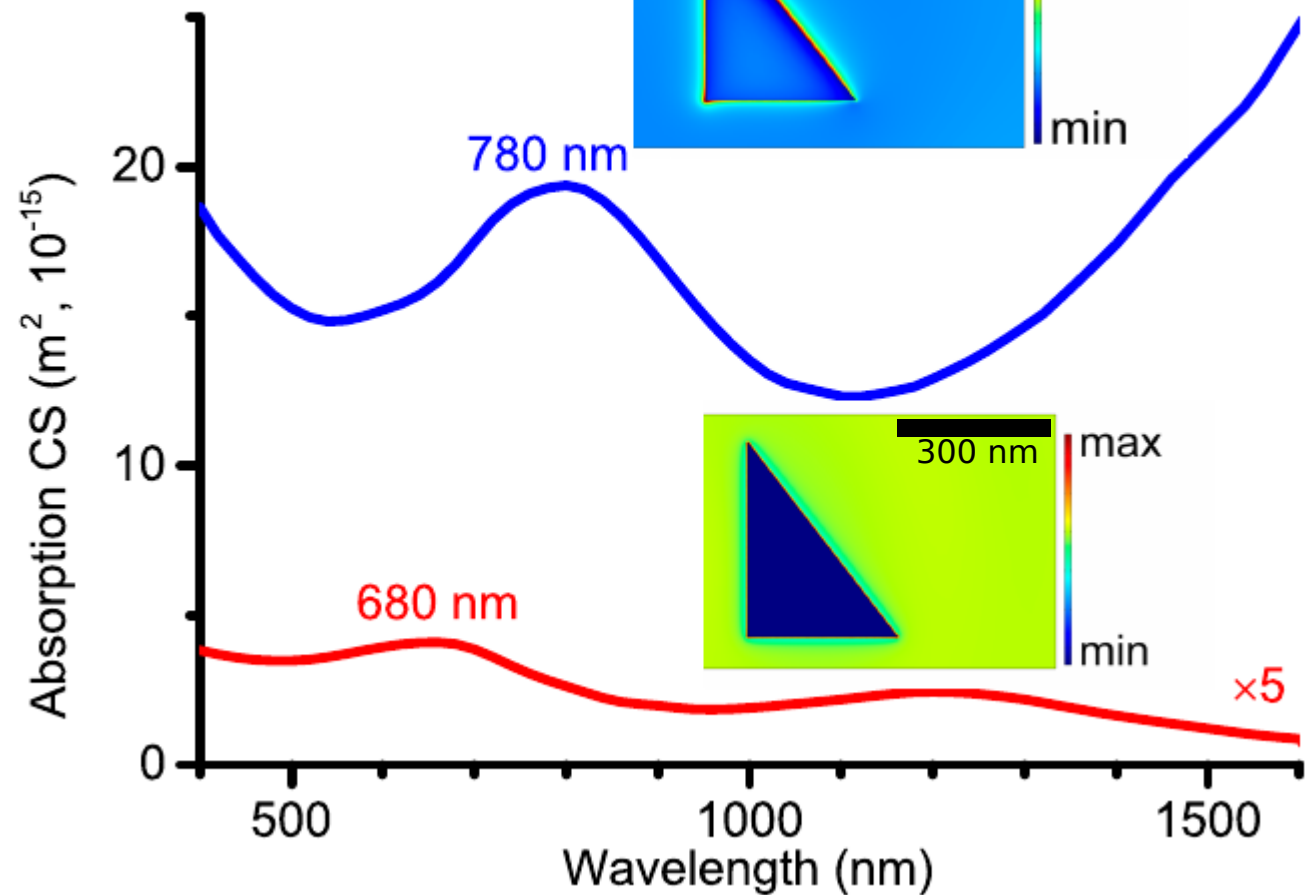

Supplement: s1 [file s1 › FIGURES/Fig5_ANN-eps-converted-to.pdf]

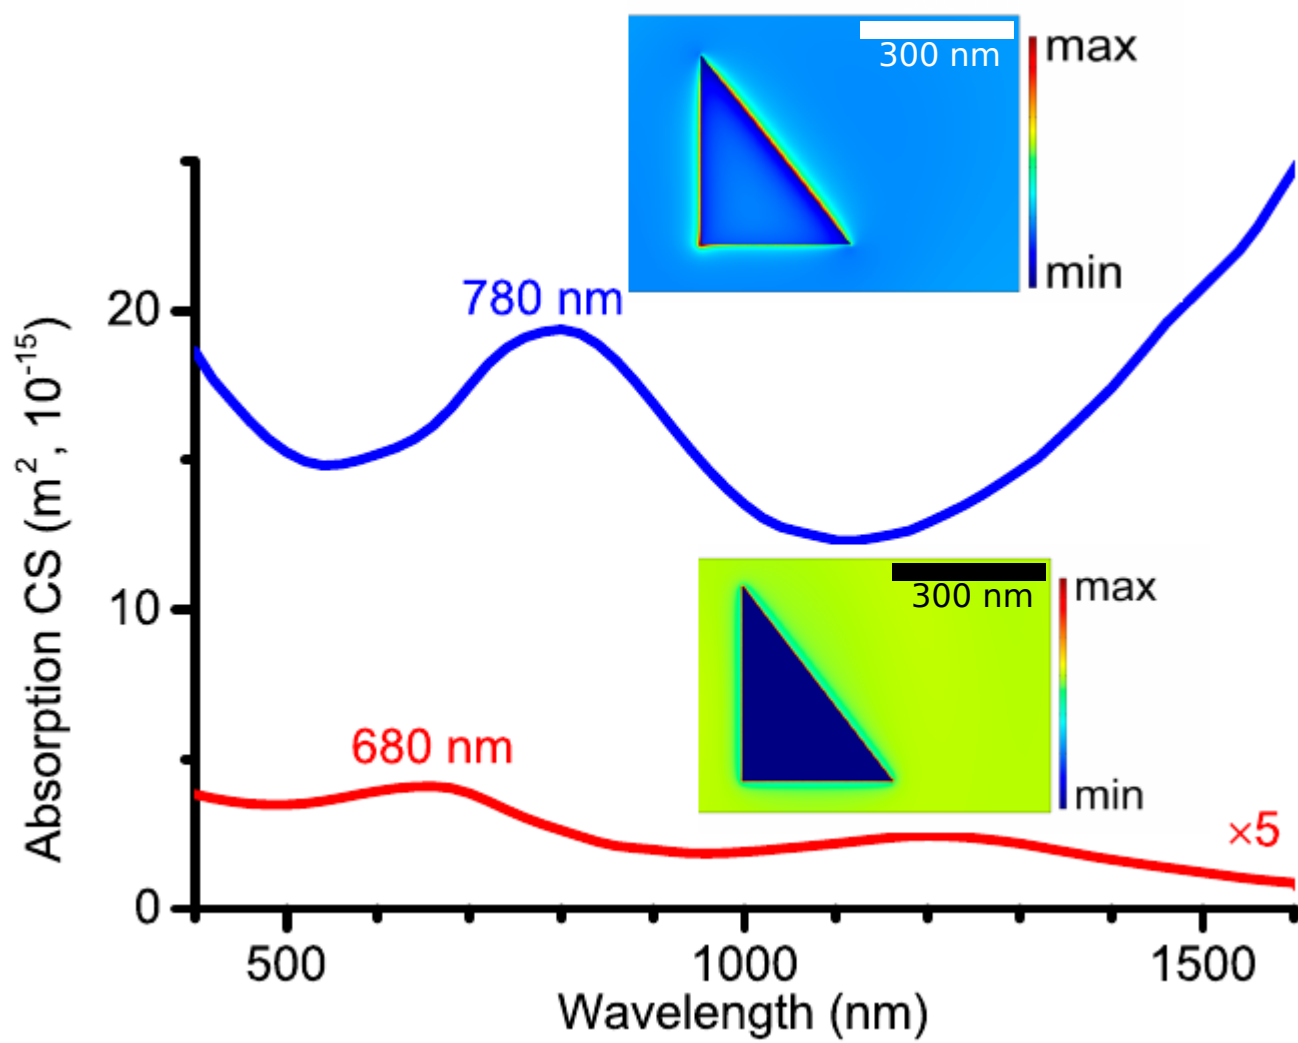

Supplement: s1 [file s1 › FIGURES/Fig5_ANN.pdf]

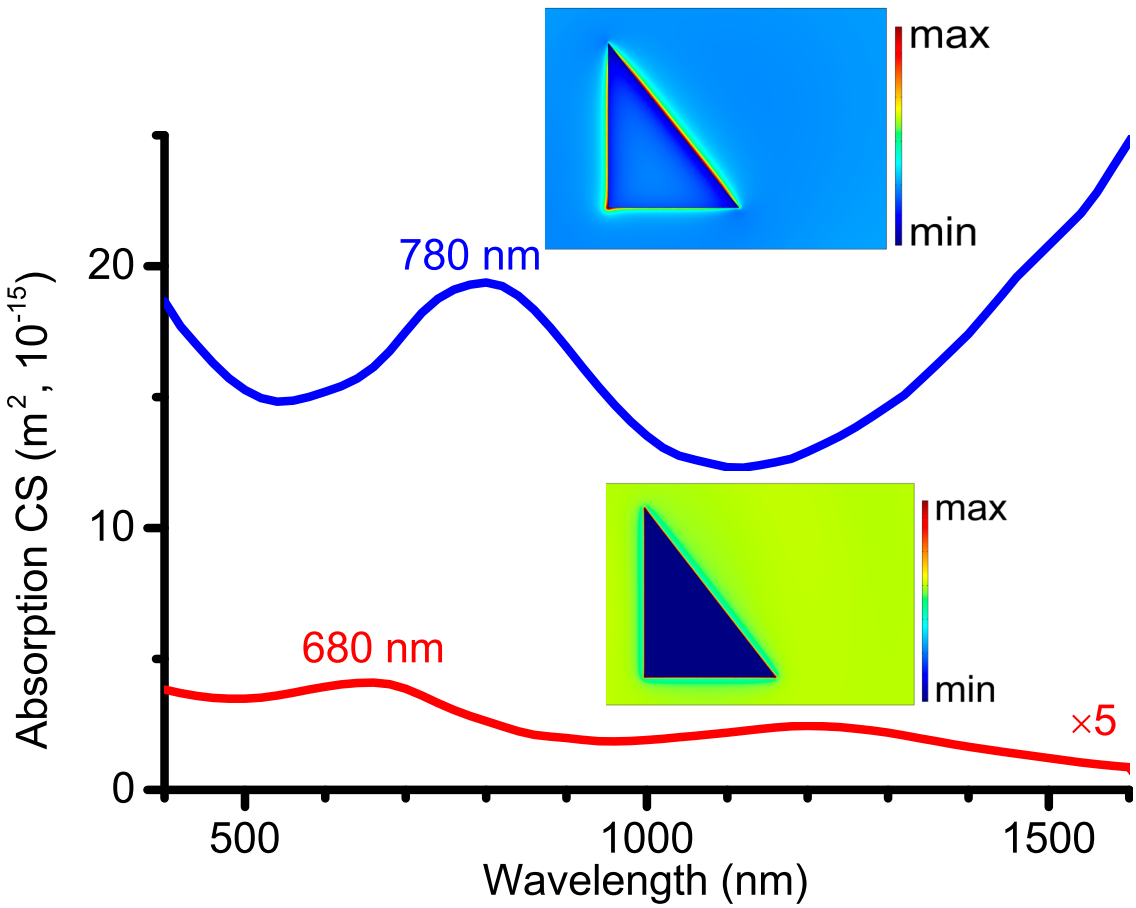

Supplement: s1 [file s1 › FIGURES/Fig5-eps-converted-to.pdf]

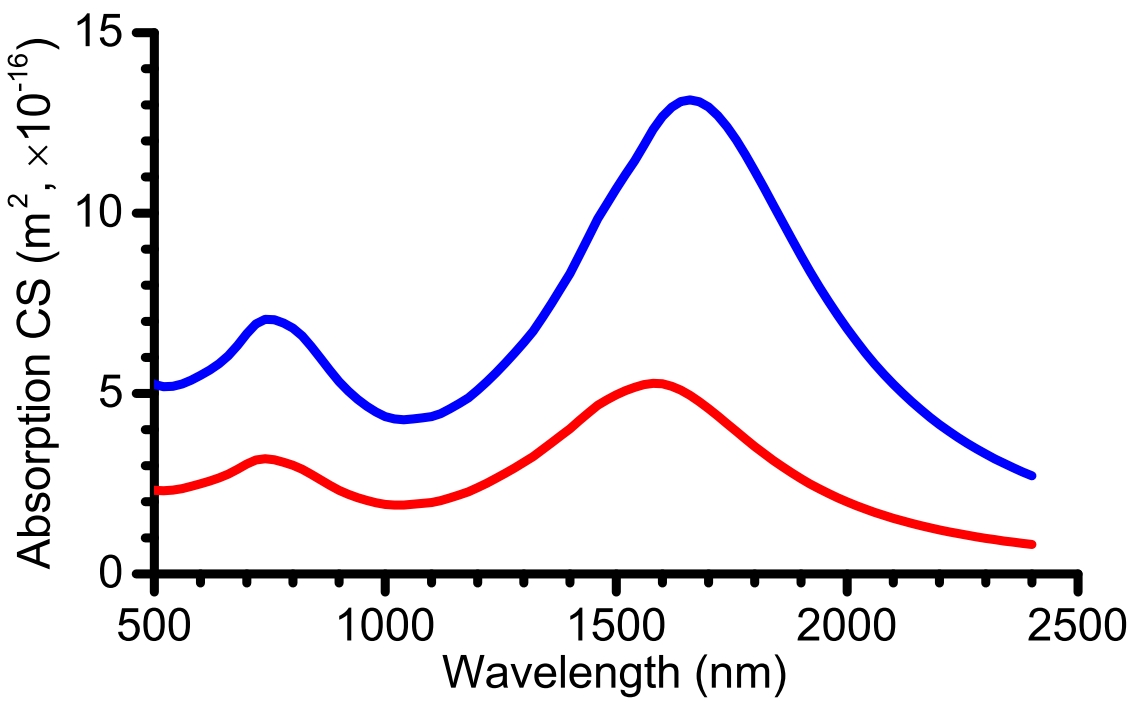

Supplement: s1 [file s1 › FIGURES/Fig6-eps-converted-to.pdf]

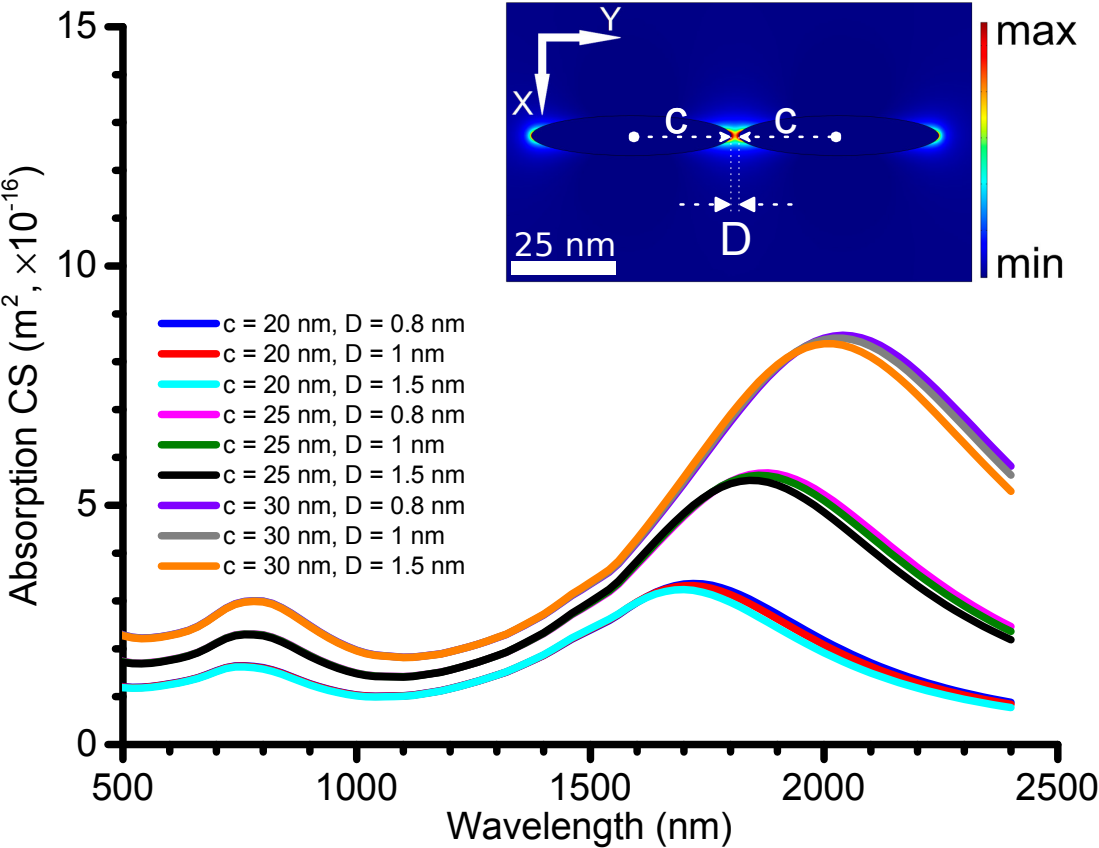

Supplement: s1 [file s1 › FIGURES/Fig7_ANN-eps-converted-to.pdf]

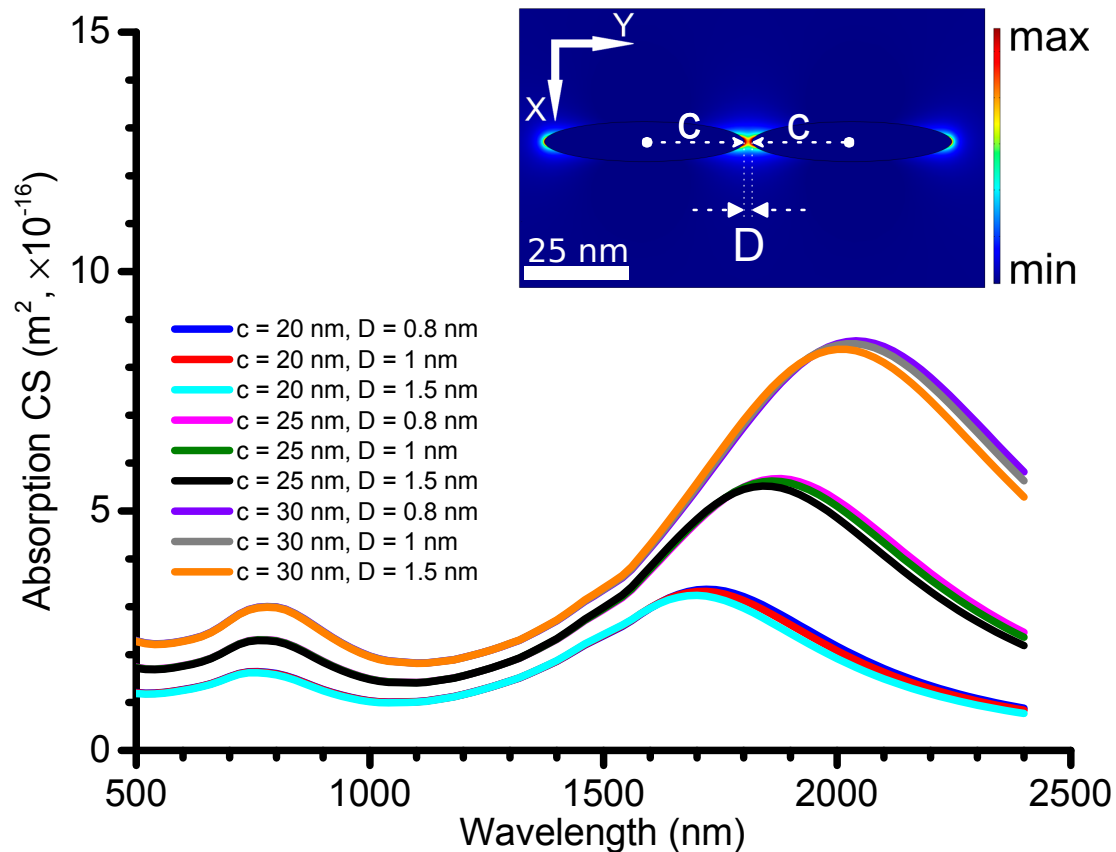

Supplement: s1 [file s1 › FIGURES/Fig7_ANN.pdf]

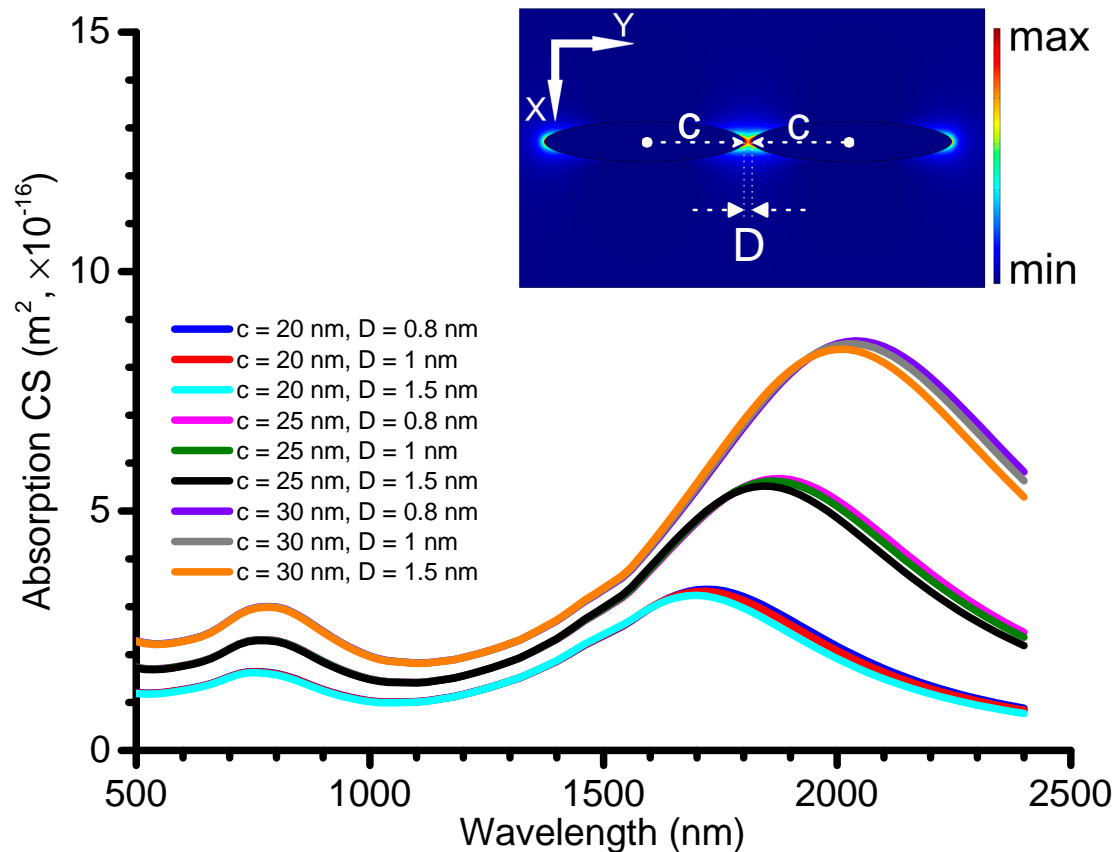

Supplement: s1 [file s1 › FIGURES/Fig7.pdf]

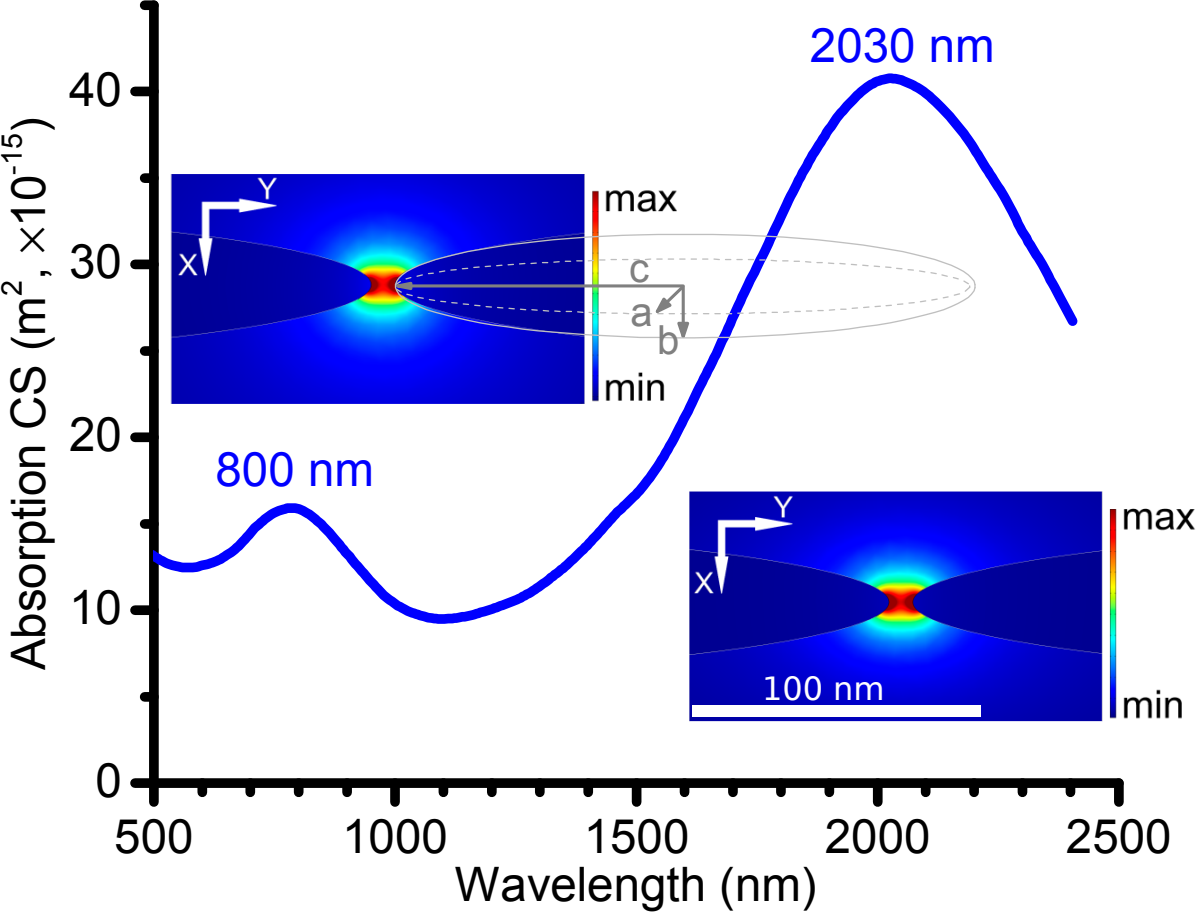

Supplement: s1 [file s1 › FIGURES/Fig8_ANN-eps-converted-to.pdf]

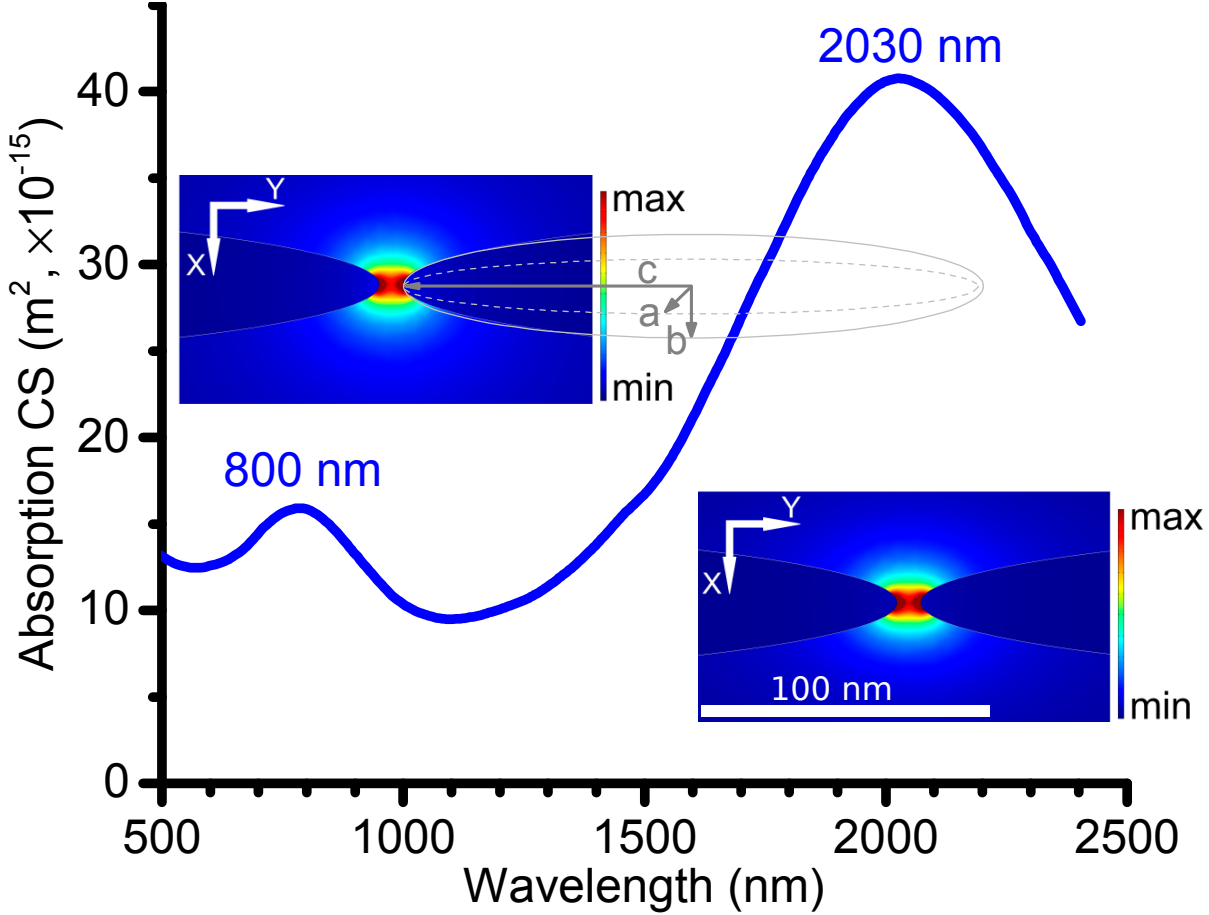

Supplement: s1 [file s1 › FIGURES/Fig8_ANN.pdf]

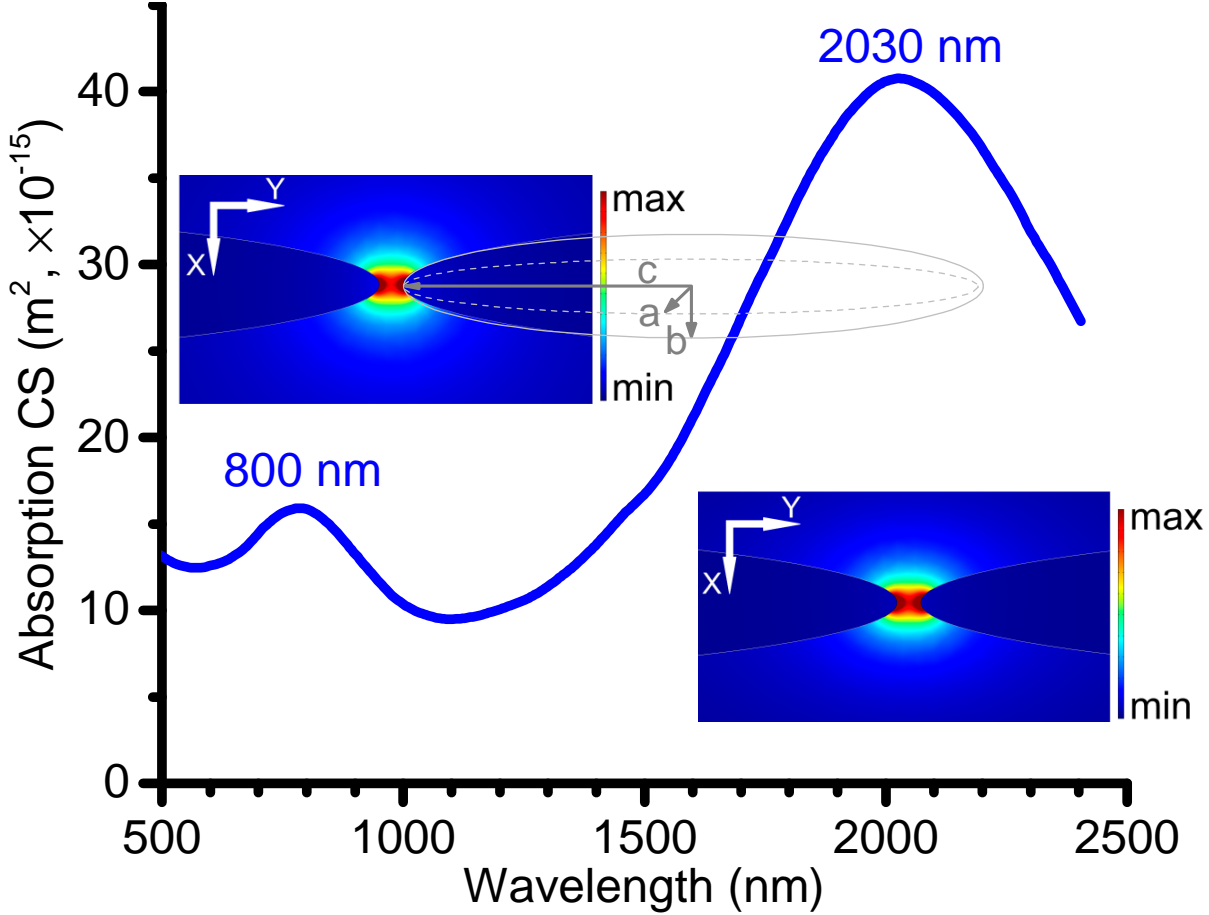

Supplement: s1 [file s1 › FIGURES/Fig8.pdf]

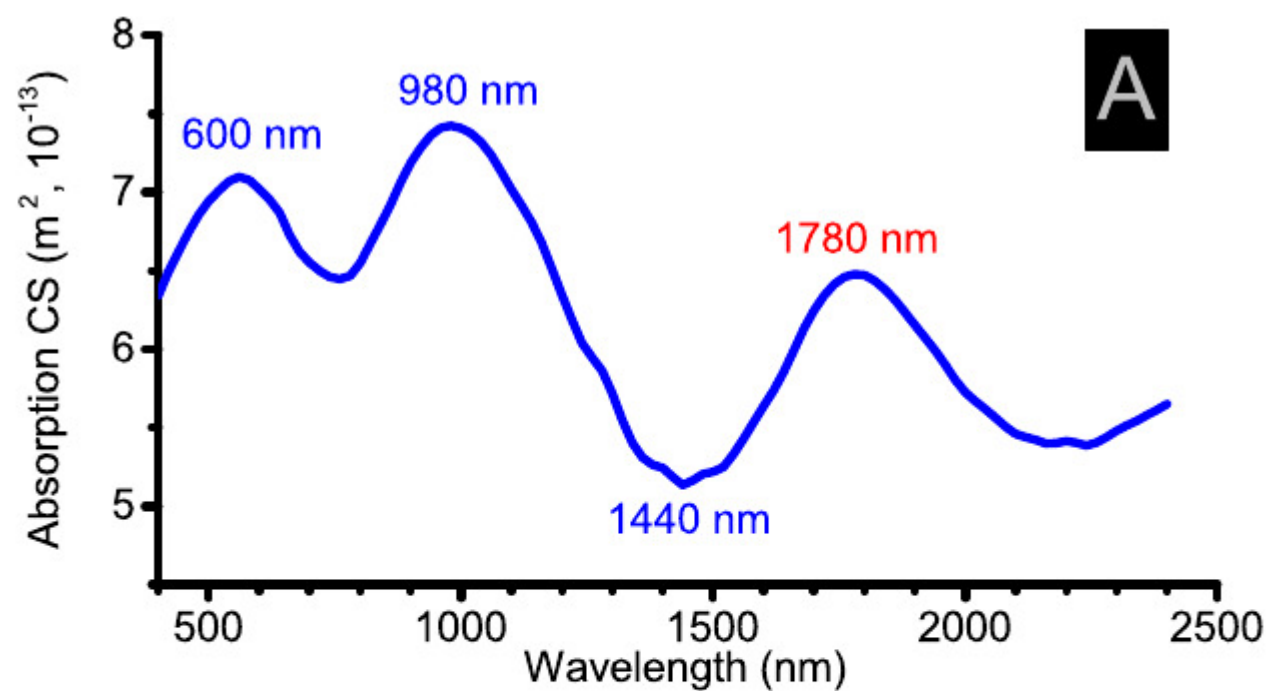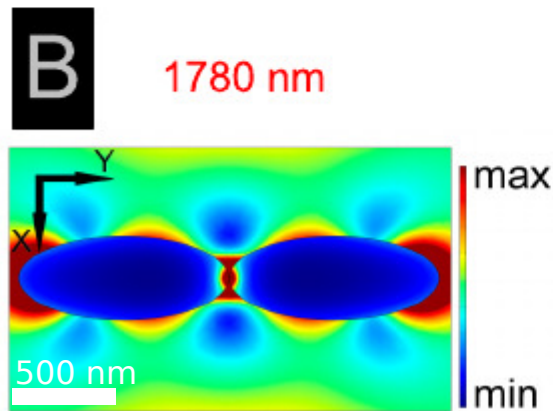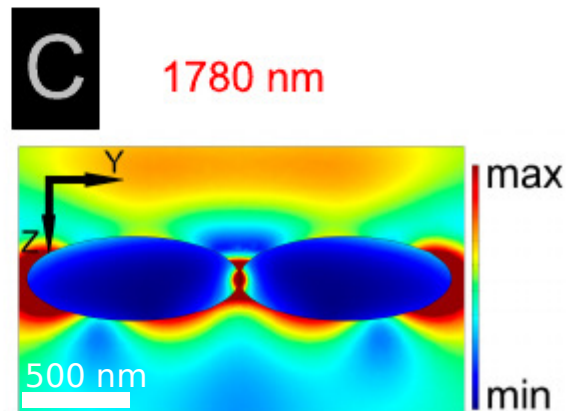

Supplement: s1 [file s1 › FIGURES/Fig9_ANN-eps-converted-to.pdf]

**A**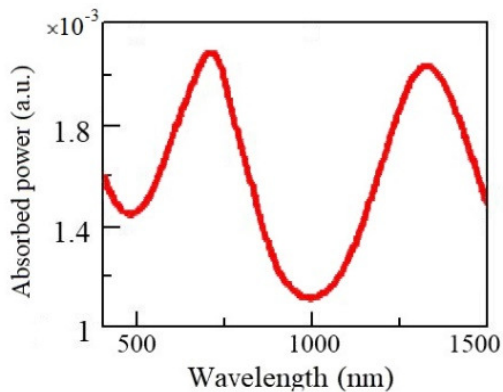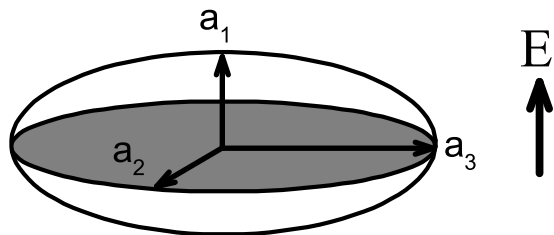**B**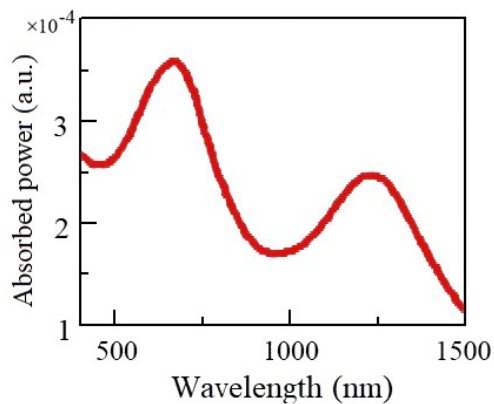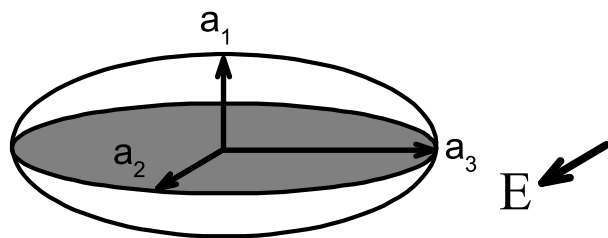**C**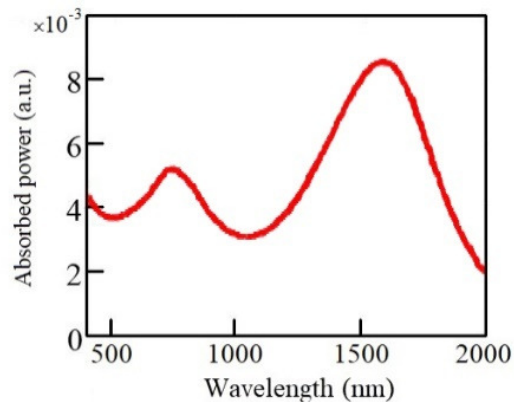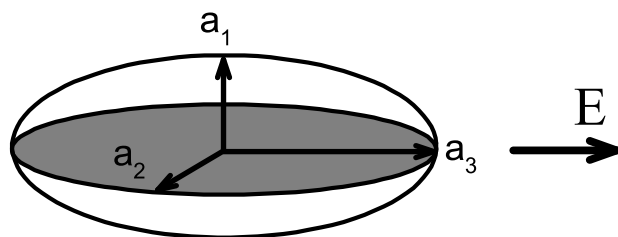

Supplement: s1 [file s1 › FIGURES/FigS1-eps-converted-to.pdf]

**A**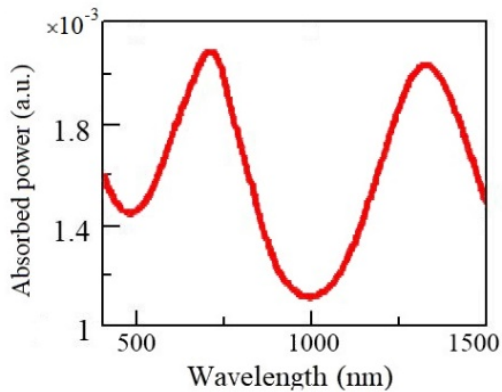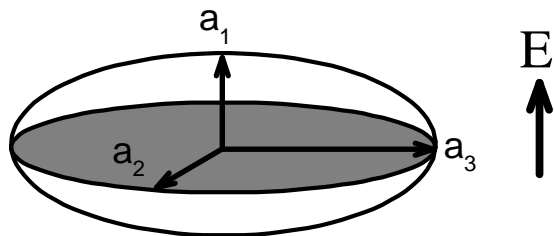**B**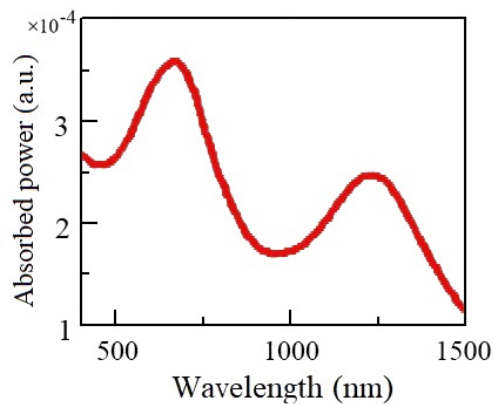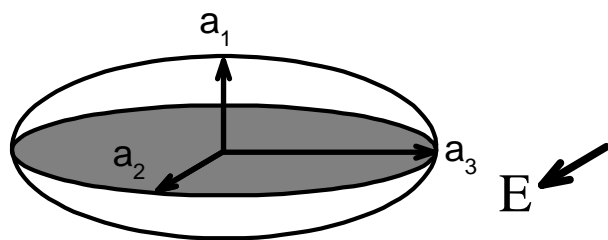**C**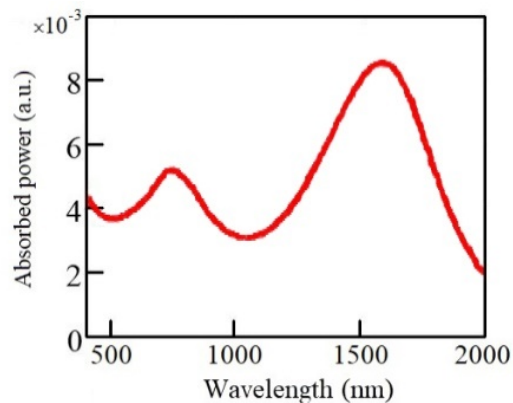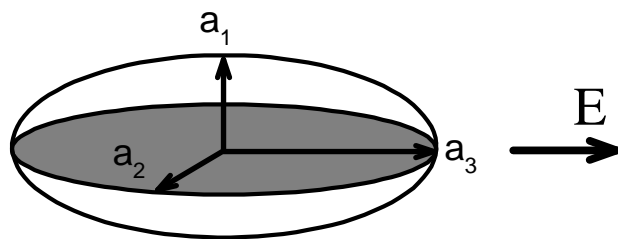

Supplement: s1 [file s1 › FIGURES/FigS1.pdf]

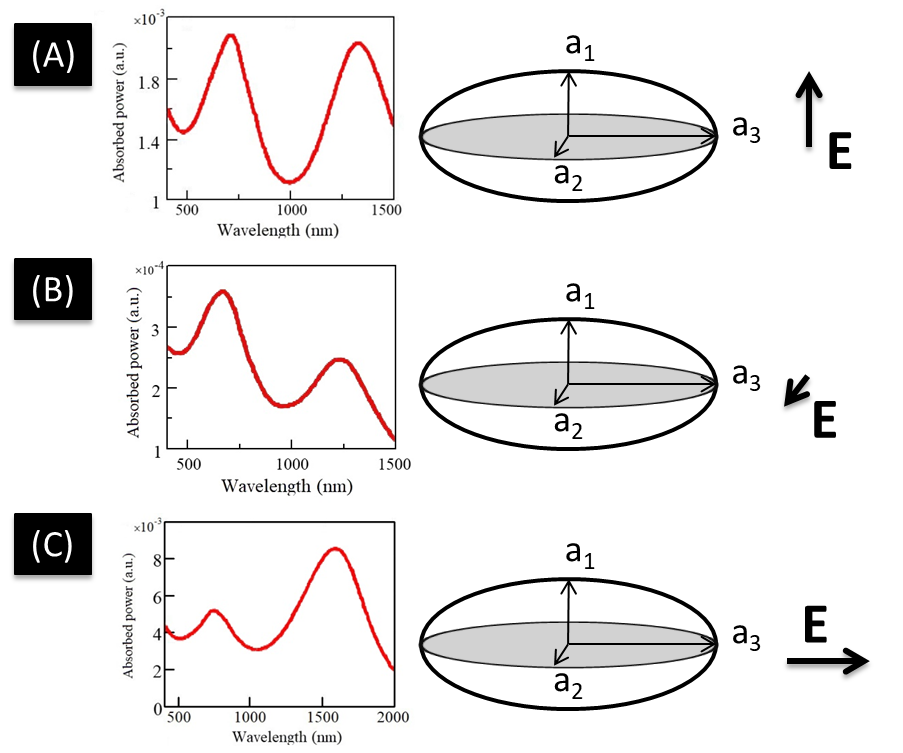

Supplement: s1 [file s1 › FIGURES/FigS1.png]

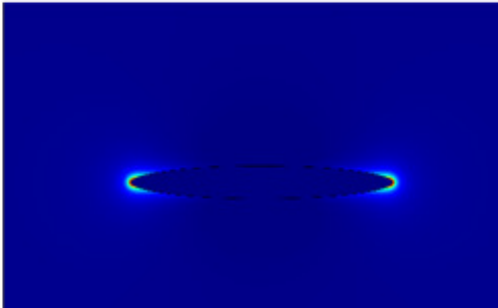

Supplement: s1 [file s1 › FIGURES/FigS2_1-eps-converted-to.pdf]

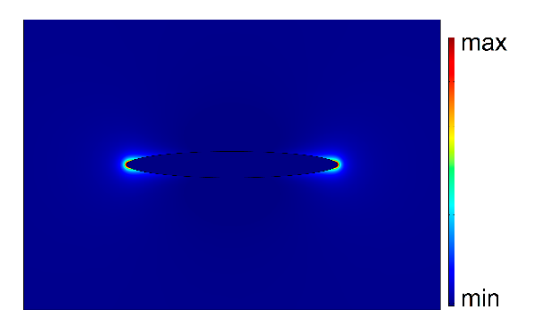

Supplement: s1 [file s1 › FIGURES/FigS2_1.png]

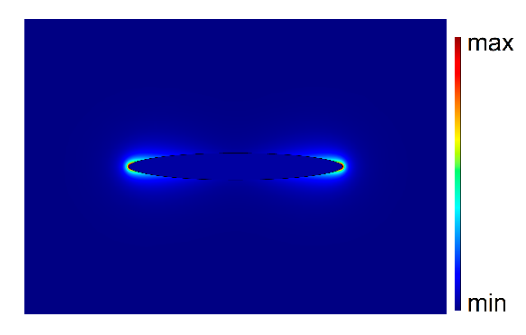

Supplement: s1 [file s1 › FIGURES/FigS2_2.png]

(a)

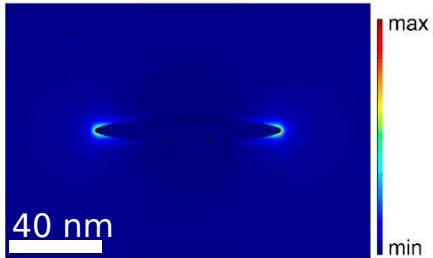

(b)

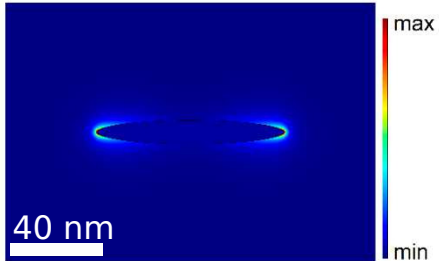

Supplement: s1 [file s1 › FIGURES/FigS2_ANN-eps-converted-to.pdf]

(a)

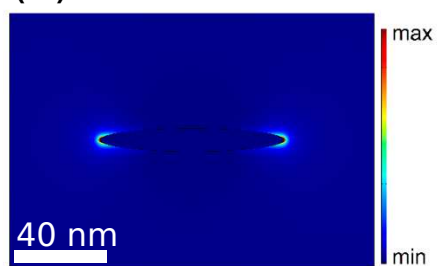

(b)

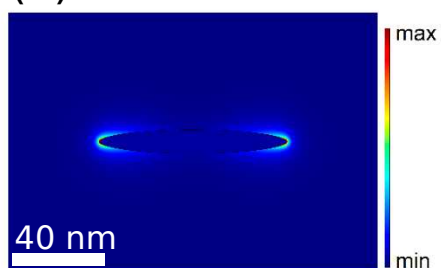

Supplement: s1 [file s1 › FIGURES/FigS2_ANN.pdf]

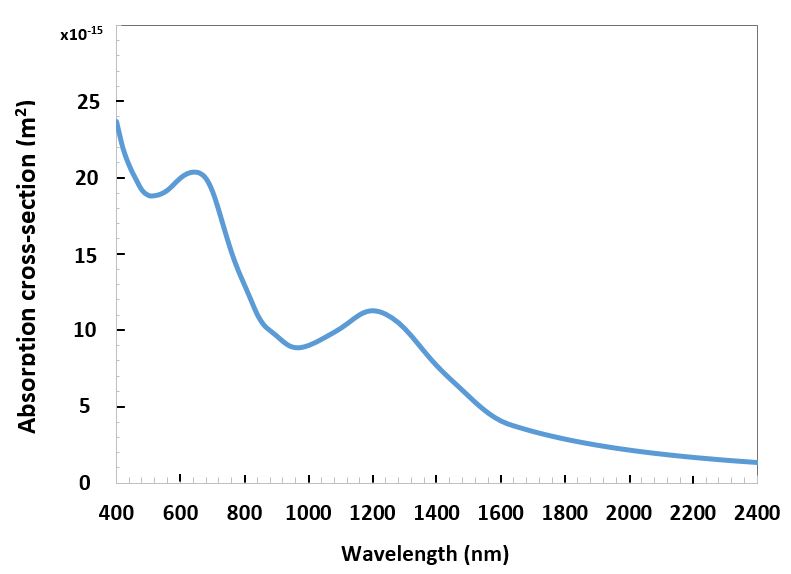

Supplement: s1 [file s1 › FIGURES/FigS3.png]

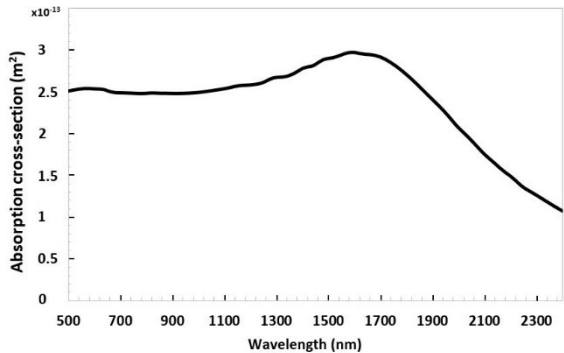

Supplement: s1 [file s1 › FIGURES/FigS4_1-eps-converted-to.pdf]

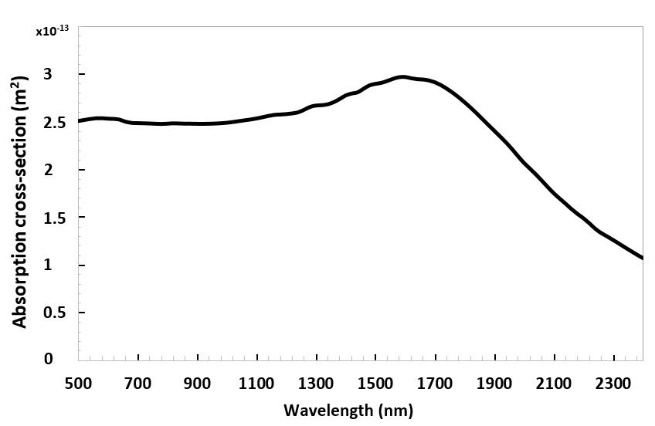

Supplement: s1 [file s1 › FIGURES/FigS4_1.png]

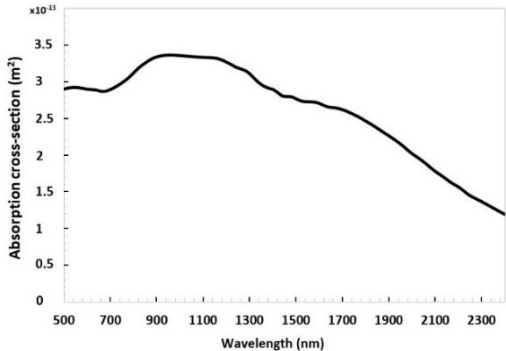

Supplement: s1 [file s1 › FIGURES/FigS4_2-eps-converted-to.pdf]

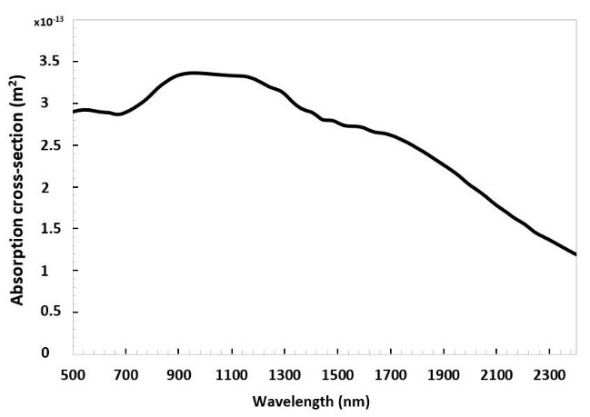

Supplement: s1 [file s1 › FIGURES/FigS4_2.png]

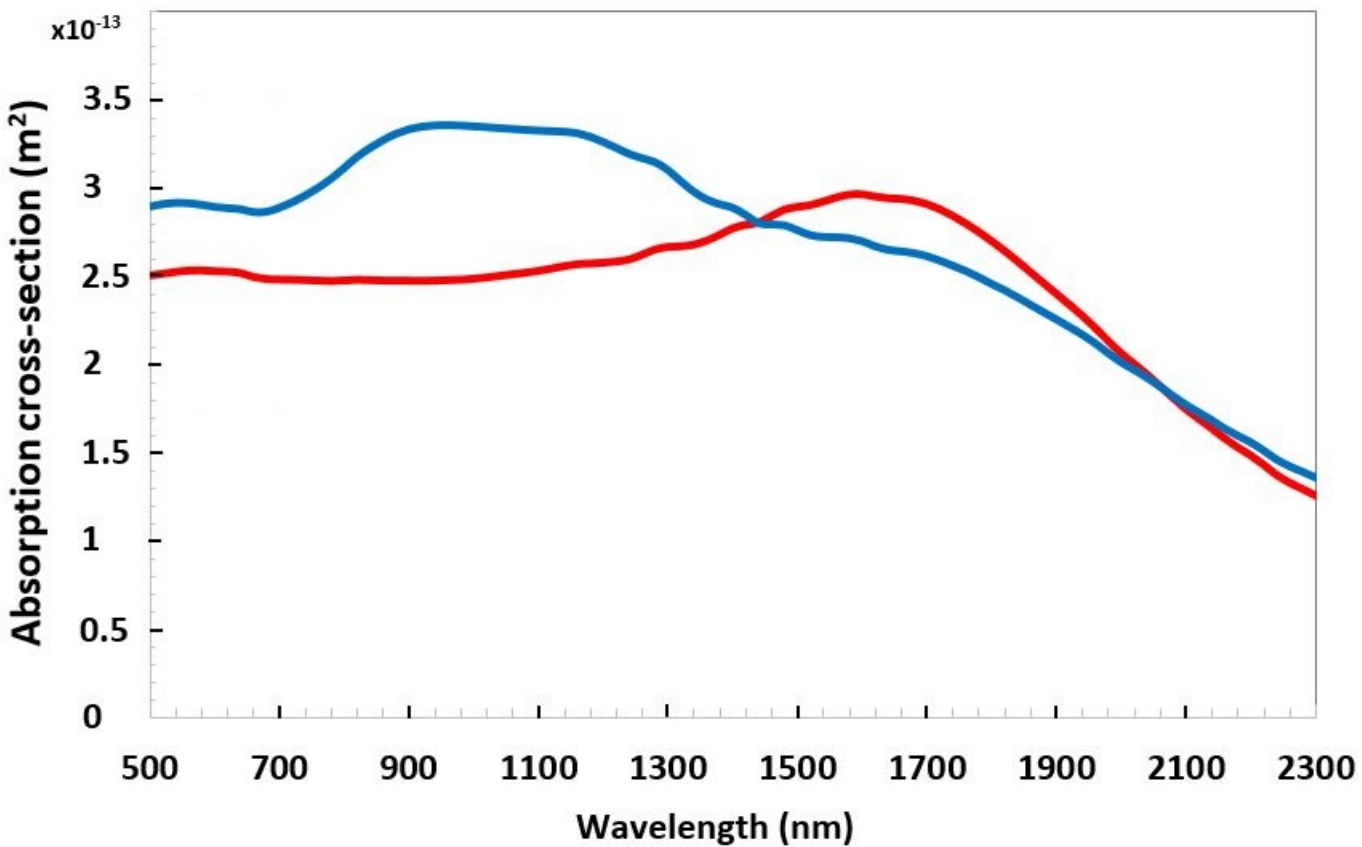

Supplement: s1 [file s1 › FIGURES/FigS4_ANN-eps-converted-to.pdf]

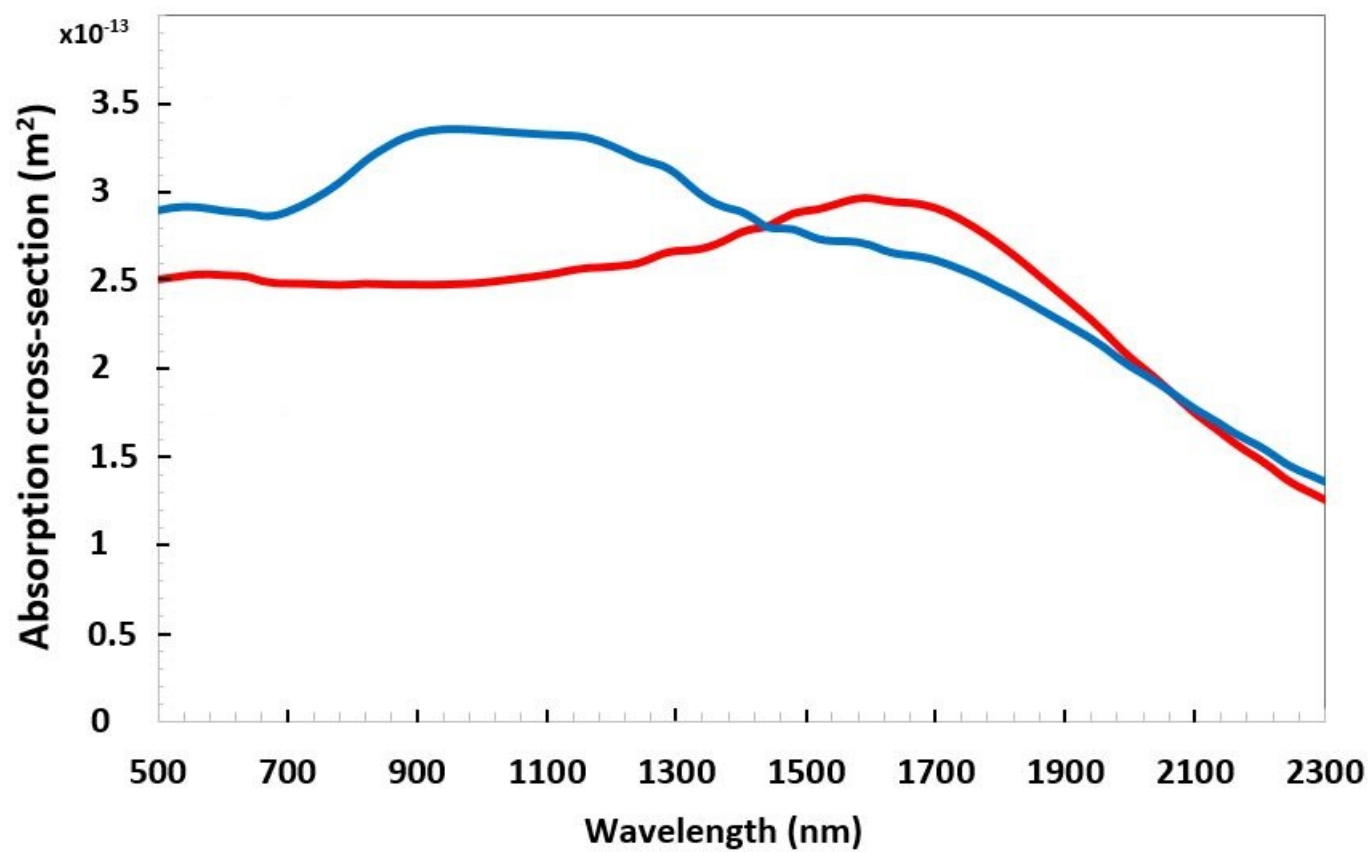

Supplement: s1 [file s1 › FIGURES/FigS4_ANN.pdf]

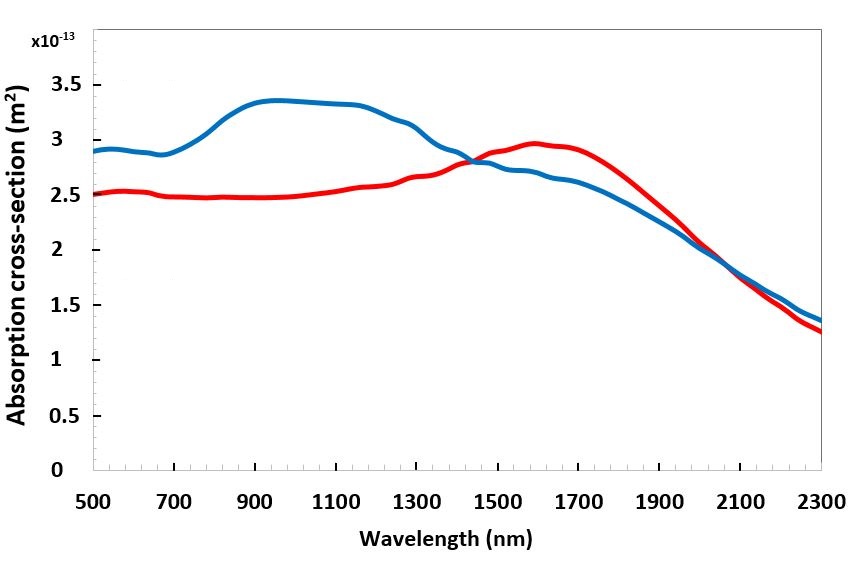

Supplement: s1 [file s1 › FIGURES/Fig_S4.JPG]

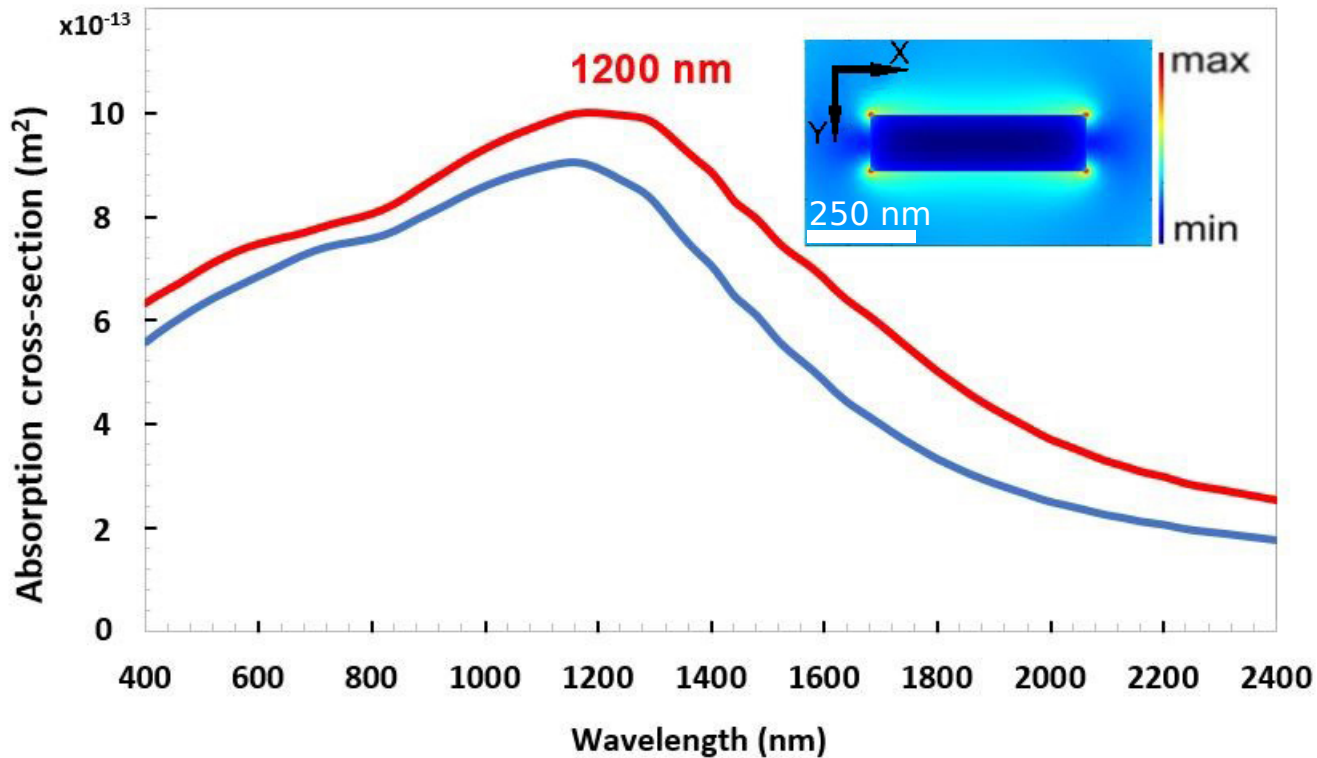

Supplement: s1 [file s1 › FIGURES/FigS5_ANN-eps-converted-to.pdf]

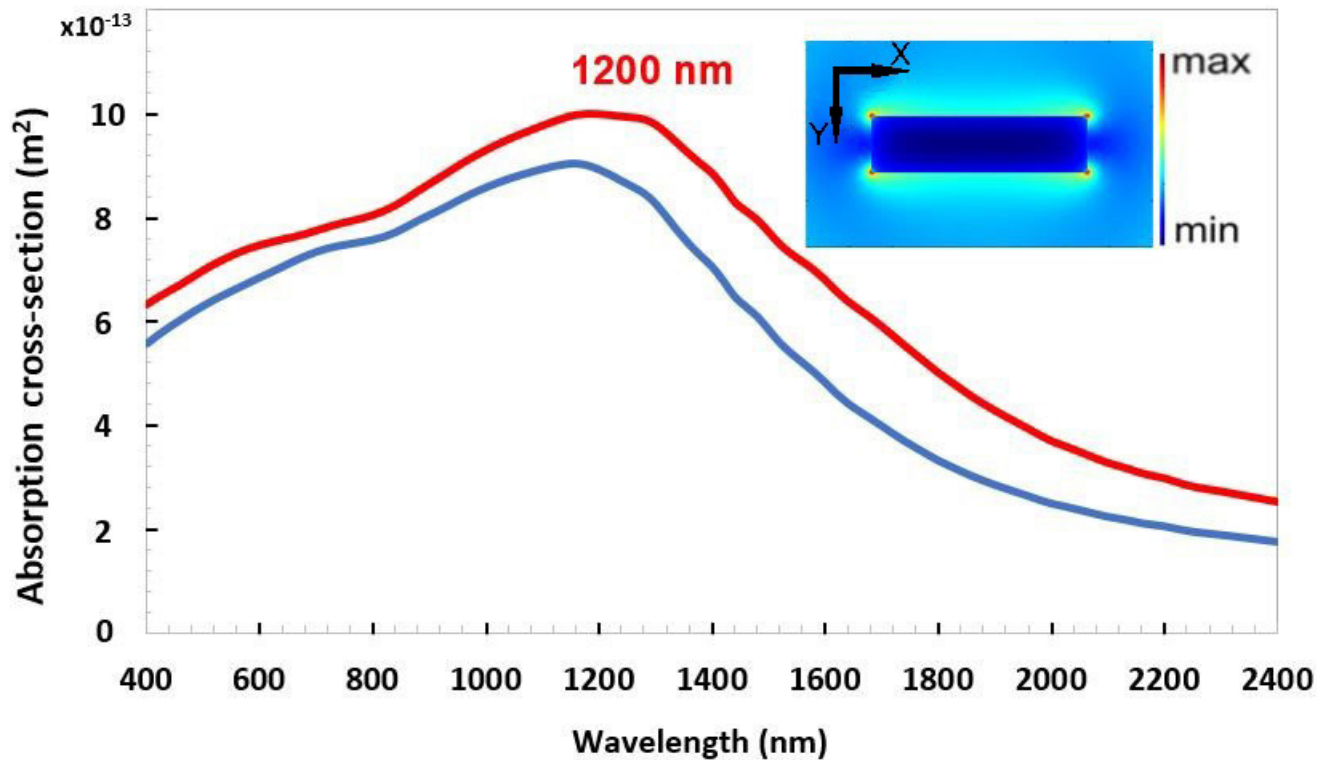

Supplement: s1 [file s1 › FIGURES/FigS5-eps-converted-to.pdf]

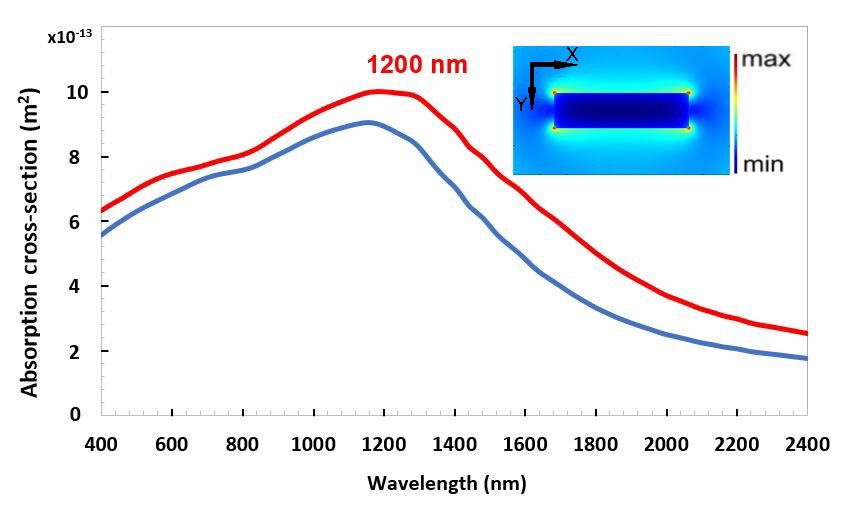

Supplement: s1 [file s1 › FIGURES/FigS5.png]

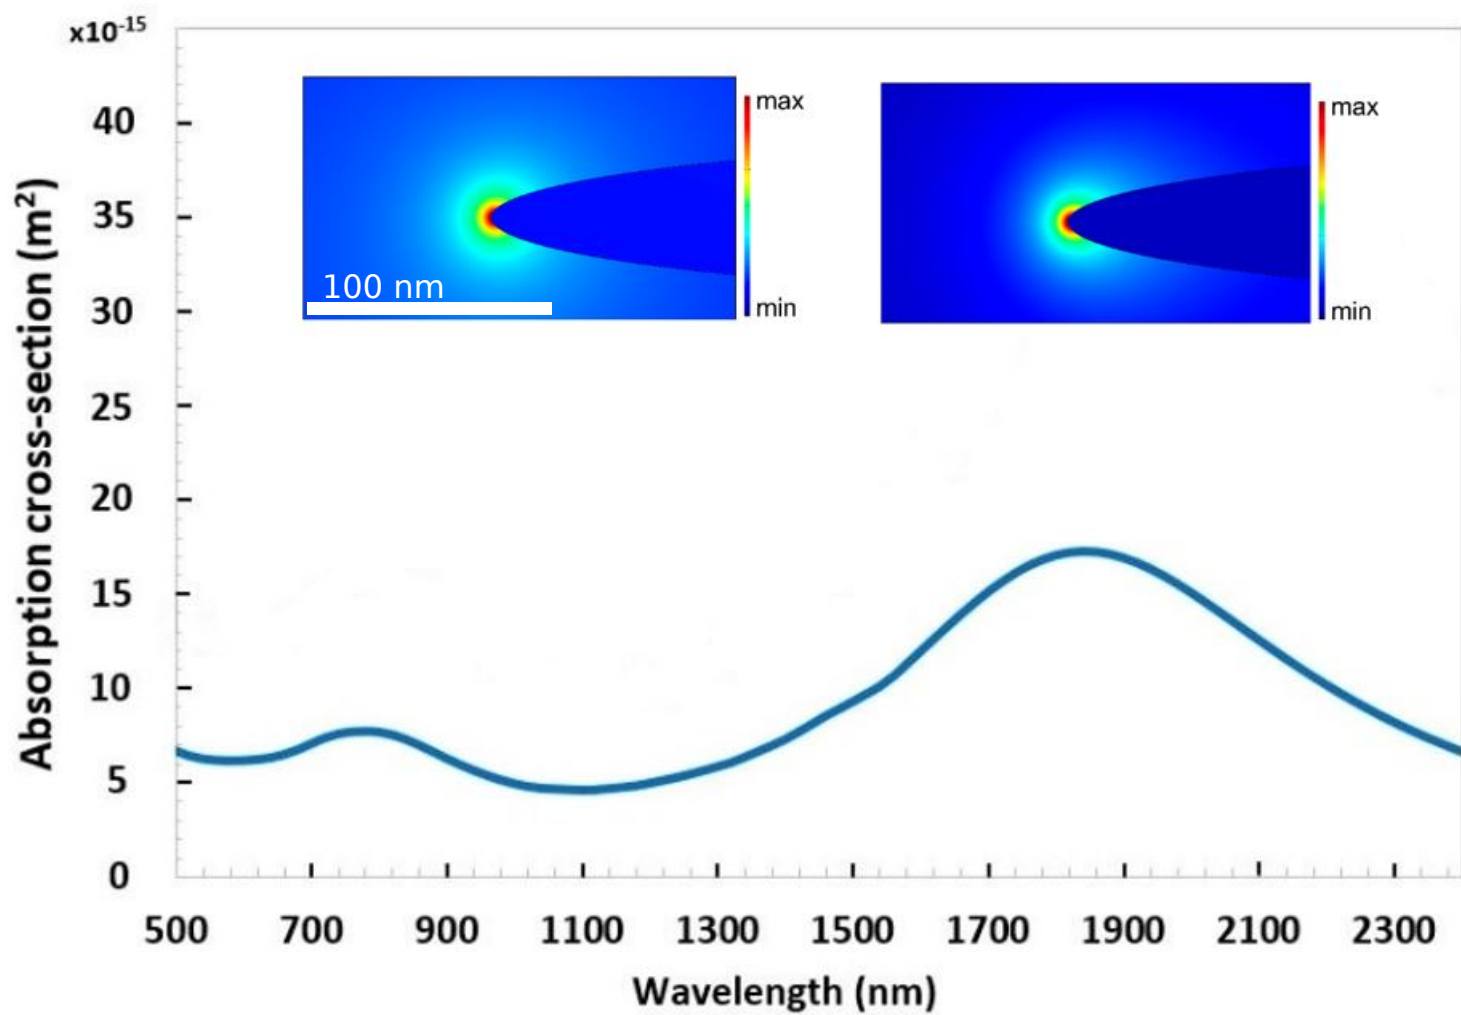

Supplement: s1 [file s1 › FIGURES/FigS6_ANN.pdf]

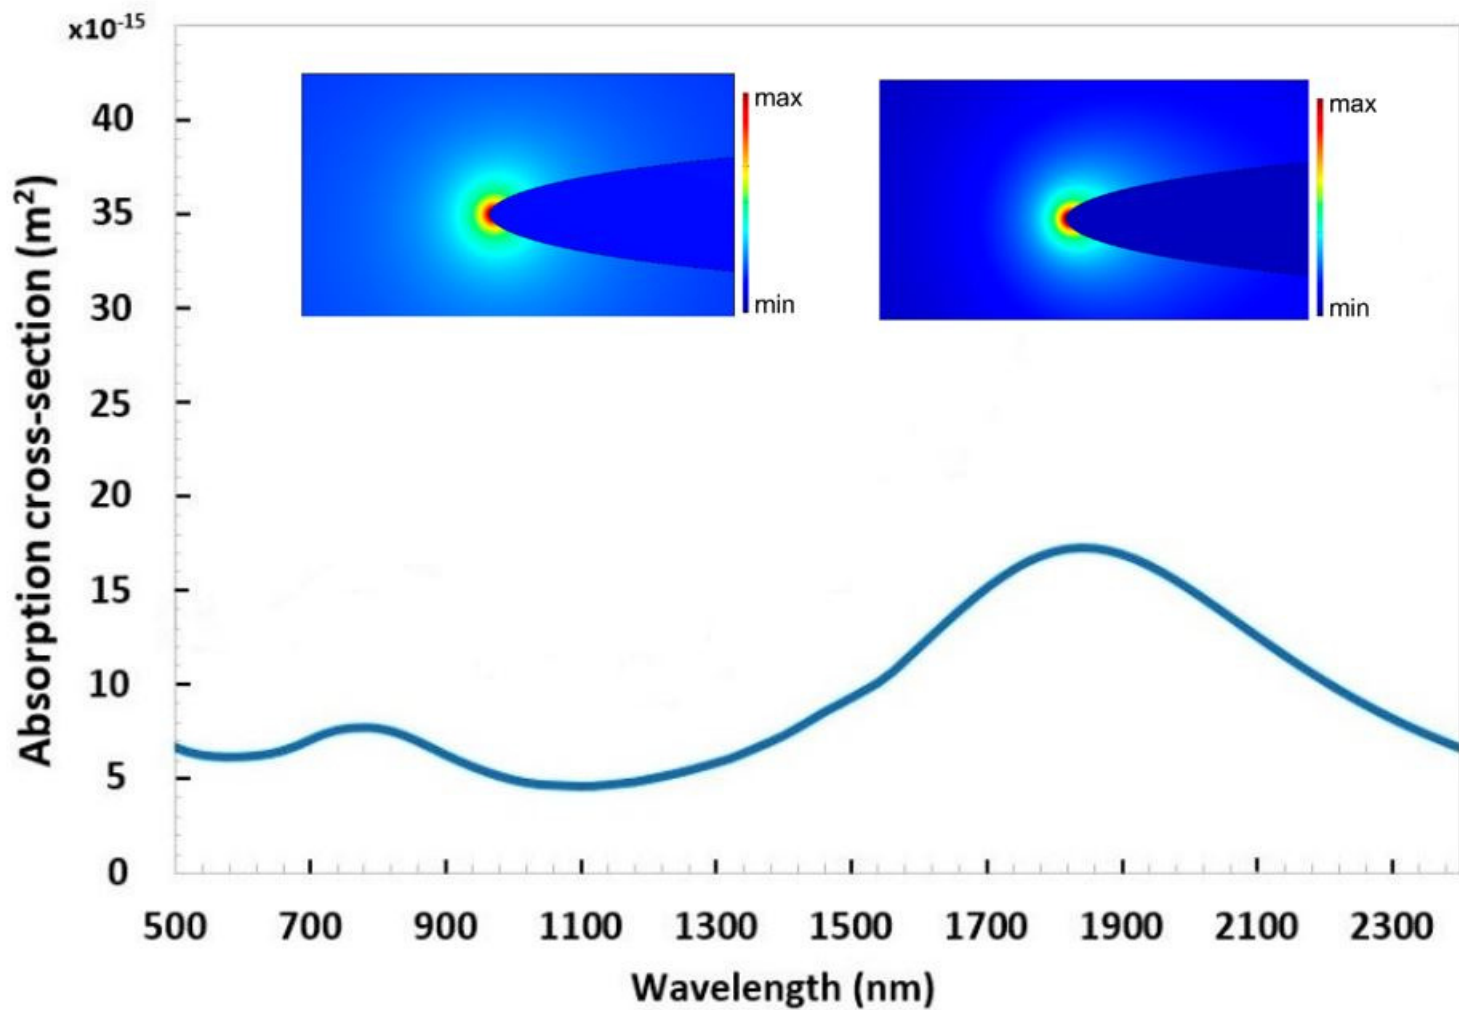

Supplement: s1 [file s1 › FIGURES/FigS6-eps-converted-to.pdf]

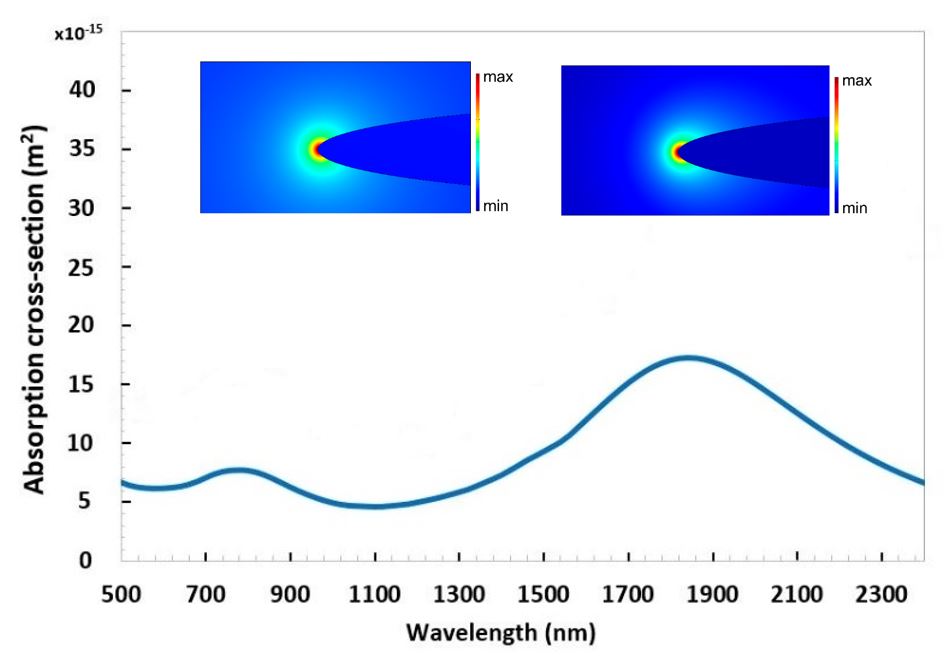

Supplement: s1 [file s1 › FIGURES/FigS6.png]

*light incidence direction*

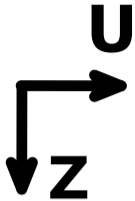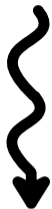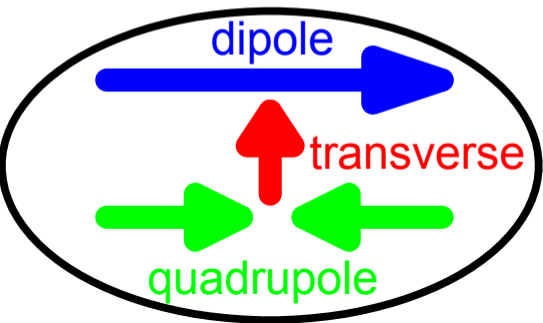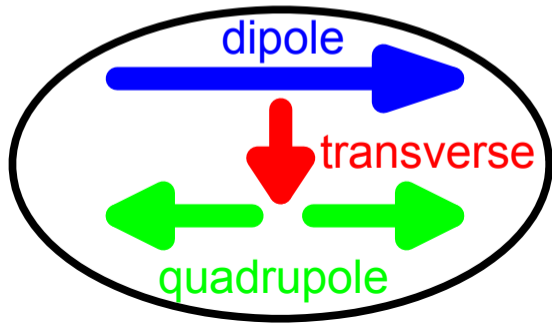

Supplement: s1 [file s1 › FIGURES/FigS7_ANN-eps-converted-to.pdf]

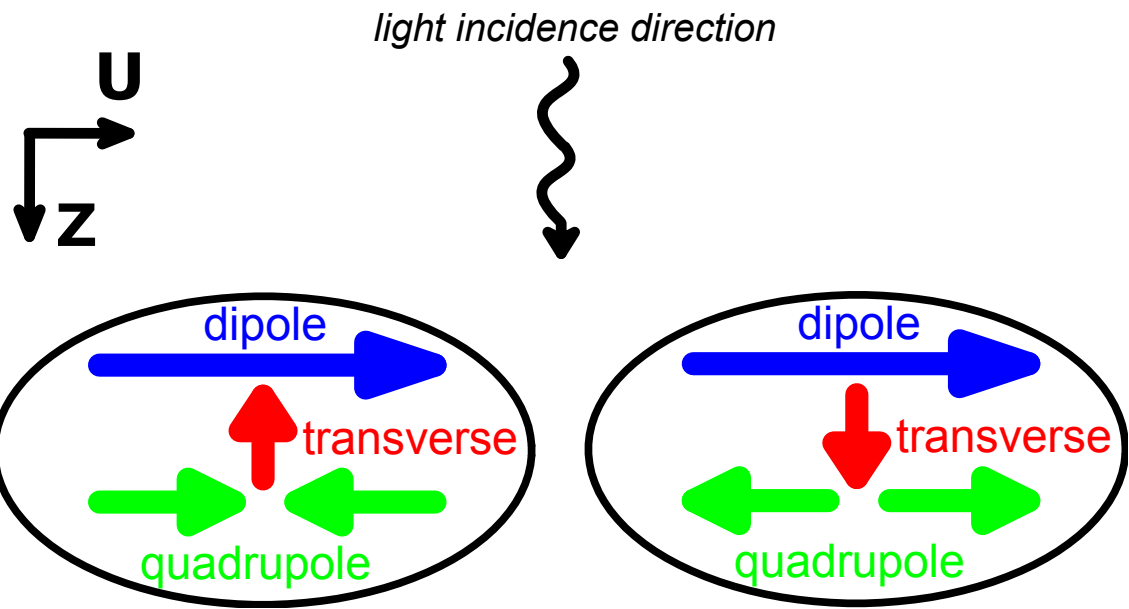

Supplement: s1 [file s1 › FIGURES/FigS7_ANN.pdf]

*light incidence direction*

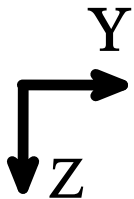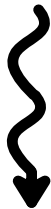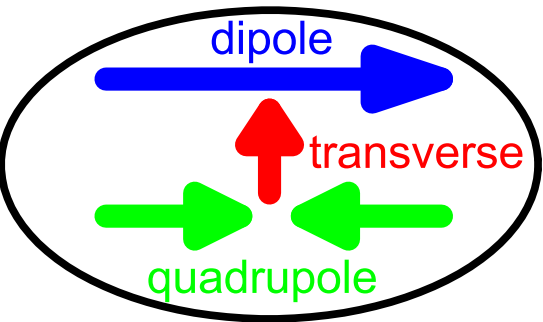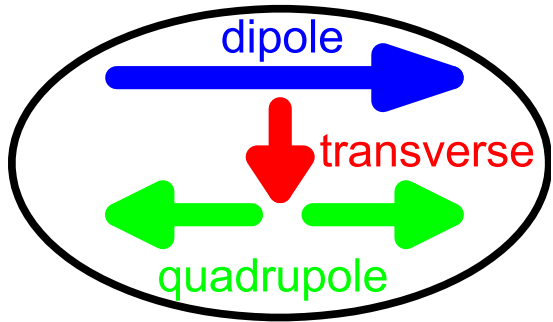

Supplement: s1 [file s1 › FIGURES/FigS7-eps-converted-to.pdf]

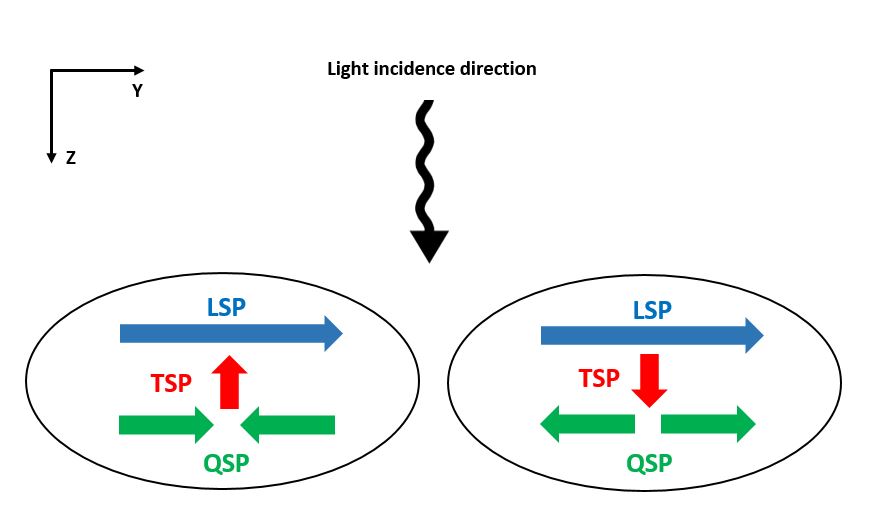

Supplement: s1 [file s1 › FIGURES/Fig_S7.JPG]

*light incidence direction*

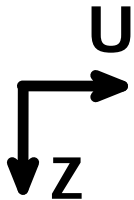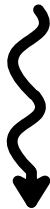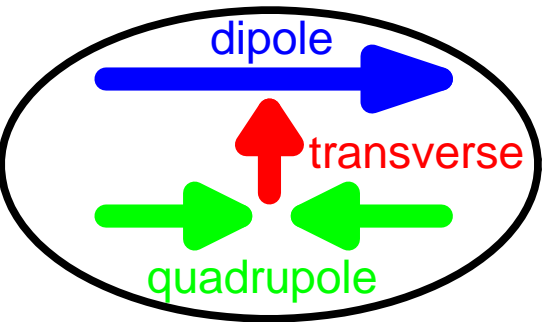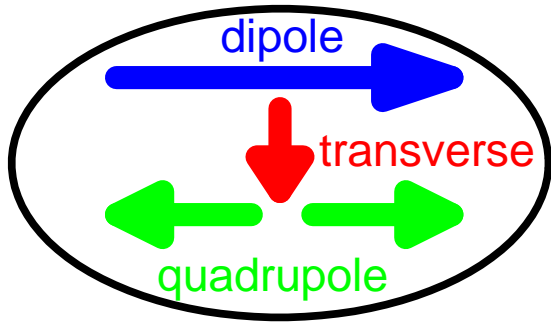

Supplement: s1 [file s1 › FIGURES/FigS7.pdf]
